# Supplementary material
Source: PubMed Central journal article supplement (PMC5691429)
Supplement: AEM.01454-17_zam999118174s1.pdf [file AEM.01454-17_zam999118174s1.pdf]

**TABLE S1.** List of the 2,299 genes present in SF EHEC O157:H<sup>-</sup> Czech (258/98) and German (3072/96) strains that were subjected to whole-genome sequencing, and in control SF EHEC O157:H<sup>-</sup> strain 493/89 (GenBank accession no. AETY000000000) and NSF EHEC O157:H7 strains EDL933 (GenBank accession no. NZ\_CP008957) and Sakai (GenBank accession no. NC\_002695). The locus tags of the reference sequence of EHEC O157:H7 strain Sakai are given.

| Locus tag | 258/98 | 493/89 | 3072/96 | EDL933 | Sakai |
|-----------|--------|--------|---------|--------|-------|
| ECs0002   | 2      | 2      | 2       | 2      | 2     |
| ECs0003   | 3      | 3      | 3       | 2      | 2     |
| ECs0004   | 2      | 2      | 2       | 2      | 2     |
| ECs0006   | 3      | 3      | 3       | 3      | 3     |
| ECs0007   | 2      | 2      | 2       | 2      | 2     |
| ECs0008   | 2      | 2      | 2       | 2      | 2     |
| ECs0009   | 2      | 2      | 2       | 2      | 2     |
| ECs0010   | 3      | 3      | 3       | 3      | 3     |
| ECs0012   | 1      | 1      | 1       | 1      | 1     |
| ECs0013   | 3      | 3      | 3       | 2      | 2     |
| ECs0014   | 2      | 2      | 2       | 2      | 2     |
| ECs0026   | 1      | 1      | 1       | 1      | 1     |
| ECs0027   | 2      | 2      | 2       | 2      | 2     |
| ECs0028   | 2      | 2      | 2       | 2      | 2     |
| ECs0029   | 2      | 2      | 2       | 2      | 2     |
| ECs0030   | 2      | 2      | 2       | 2      | 2     |
| ECs0031   | 2      | 2      | 2       | 2      | 2     |
| ECs0032   | 2      | 2      | 2       | 2      | 2     |
| ECs0033   | 2      | 2      | 2       | 2      | 2     |
| ECs0034   | 3      | 3      | 3       | 2      | 2     |
| ECs0035   | 2      | 2      | 2       | 2      | 2     |
| ECs0036   | 4      | 4      | 2       | 2      | 2     |
| ECs0037   | 2      | 2      | 2       | 2      | 2     |
| ECs0039   | 3      | 3      | 3       | 2      | 2     |
| ECs0040   | 3      | 3      | 3       | 2      | 2     |
| ECs0041   | 3      | 3      | 3       | 2      | 2     |
| ECs0042   | 1      | 1      | 1       | 1      | 1     |
| ECs0043   | 3      | 3      | 3       | 2      | 2     |
| ECs0044   | 2      | 2      | 2       | 2      | 2     |
| ECs0045   | 3      | 3      | 3       | 19     | 19    |
| ECs0046   | 3      | 3      | 3       | 2      | 2     |
| ECs0047   | 2      | 2      | 2       | 2      | 2     |
| ECs0048   | 2      | 2      | 2       | 2      | 2     |
| ECs0050   | 3      | 3      | 3       | 24     | 24    |
| ECs0051   | 3      | 3      | 3       | 2      | 2     |
| ECs0054   | 2      | 2      | 2       | 2      | 2     |
| ECs0055   | 2      | 2      | 2       | 2      | 2     |
| ECs0056   | 2      | 2      | 2       | 2      | 2     |
| ECs0057   | 3      | 3      | 3       | 3      | 3     |
| ECs0058   | 2      | 2      | 2       | 2      | 2     |
| ECs0059   | 3      | 3      | 3       | 2      | 2     |
| ECs0060   | 2      | 2      | 2       | 17     | 17    |
| ECs0062   | 2      | 2      | 2       | 2      | 2     |

| Locus tag | 258/98 | 493/89 | 3072/96 | EDL933 | Sakai |
|-----------|--------|--------|---------|--------|-------|
| ECs0085   | 2      | 2      | 2       | 2      | 2     |
| ECs0086   | 3      | 3      | 3       | 2      | 2     |
| ECs0087   | 2      | 2      | 2       | 2      | 2     |
| ECs0088   | 2      | 2      | 2       | 2      | 2     |
| ECs0090   | 2      | 2      | 2       | 2      | 2     |
| ECs0092   | 2      | 2      | 2       | 2      | 2     |
| ECs0093   | 2      | 2      | 2       | 2      | 2     |
| ECs0094   | 3      | 3      | 3       | 2      | 2     |
| ECs0095   | 2      | 2      | 2       | 2      | 2     |
| ECs0097   | 2      | 2      | 2       | 2      | 2     |
| ECs0098   | 2      | 2      | 2       | 2      | 2     |
| ECs0099   | 2      | 2      | 2       | 2      | 2     |
| ECs0100   | 2      | 2      | 2       | 2      | 2     |
| ECs0101   | 2      | 2      | 2       | 2      | 2     |
| ECs0102   | 2      | 2      | 2       | 2      | 2     |
| ECs0103   | 2      | 2      | 2       | 2      | 2     |
| ECs0105   | 2      | 2      | 2       | 2      | 2     |
| ECs0106   | 2      | 2      | 2       | 2      | 2     |
| ECs0107   | 4      | 4      | 3       | 2      | 2     |
| ECs0108   | 2      | 2      | 2       | 2      | 2     |
| ECs0111   | 3      | 3      | 3       | 2      | 2     |
| ECs0112   | 2      | 2      | 2       | 2      | 2     |
| ECs0113   | 2      | 2      | 2       | 2      | 2     |
| ECs0114   | 3      | 3      | 3       | 2      | 2     |
| ECs0115   | 3      | 3      | 3       | 2      | 2     |
| ECs0116   | 3      | 3      | 3       | 2      | 2     |
| ECs0118   | 2      | 2      | 2       | 2      | 2     |
| ECs0119   | 3      | 3      | 3       | 2      | 2     |
| ECs0120   | 2      | 2      | 2       | 2      | 2     |
| ECs0122   | 3      | 3      | 3       | 2      | 2     |
| ECs0123   | 2      | 2      | 2       | 2      | 2     |
| ECs0124   | 2      | 2      | 2       | 2      | 2     |
| ECs0125   | 2      | 2      | 2       | 2      | 2     |
| ECs0126   | 2      | 2      | 2       | 2      | 2     |
| ECs0127   | 3      | 3      | 3       | 26     | 26    |
| ECs0128   | 2      | 2      | 2       | 2      | 2     |
| ECs0129   | 2      | 2      | 2       | 2      | 2     |
| ECs0130   | 2      | 2      | 2       | 2      | 2     |
| ECs0131   | 2      | 2      | 2       | 2      | 2     |
| ECs0132   | 2      | 2      | 2       | 2      | 2     |
| ECs0133   | 2      | 2      | 2       | 2      | 2     |
| ECs0134   | 2      | 2      | 2       | 2      | 2     |
| ECs0135   | 1      | 1      | 1       | 1      | 1     |
| ECs0137   | 2      | 2      | 2       | 2      | 2     |
| ECs0147   | 2      | 2      | 2       | 2      | 2     |
| ECs0148   | 2      | 2      | 2       | 2      | 2     |
| ECs0149   | 3      | 3      | 3       | 2      | 2     |
| ECs0150   | 1      | 1      | 1       | 1      | 1     |
| ECs0151   | 3      | 3      | 3       | 2      | 2     |
| ECs0152   | 3      | 3      | 3       | 2      | 2     |
| ECs0153   | 2      | 2      | 2       | 2      | 2     |
| ECs0158   | 3      | 3      | 3       | 2      | 2     |
| ECs0159   | 3      | 3      | 3       | 21     | 21    |

| Locus tag | 258/98 | 493/89 | 3072/96 | EDL933 | Sakai |
|-----------|--------|--------|---------|--------|-------|
| ECs0160   | 2      | 2      | 2       | 2      | 2     |
| ECs0161   | 3      | 3      | 3       | 2      | 2     |
| ECs0162   | 3      | 3      | 3       | 2      | 2     |
| ECs0164   | 2      | 2      | 2       | 23     | 23    |
| ECs0165   | 3      | 3      | 3       | 3      | 3     |
| ECs0166   | 2      | 2      | 2       | 2      | 2     |
| ECs0167   | 2      | 2      | 2       | 1      | 1     |
| ECs0168   | 2      | 2      | 2       | 2      | 2     |
| ECs0169   | 2      | 2      | 2       | 2      | 2     |
| ECs0170   | 2      | 2      | 2       | 2      | 2     |
| ECs0171   | 1      | 1      | 1       | 16     | 1     |
| ECs0172   | 2      | 2      | 2       | 2      | 2     |
| ECs0173   | 2      | 2      | 2       | 2      | 2     |
| ECs0174   | 2      | 2      | 2       | 2      | 2     |
| ECs0175   | 2      | 2      | 2       | 2      | 2     |
| ECs0176   | 2      | 2      | 2       | 2      | 2     |
| ECs0177   | 1      | 1      | 2       | 1      | 1     |
| ECs0178   | 2      | 2      | 2       | 2      | 2     |
| ECs0179   | 2      | 2      | 2       | 2      | 2     |
| ECs0180   | 2      | 2      | 2       | 2      | 2     |
| ECs0181   | 2      | 2      | 2       | 2      | 2     |
| ECs0182   | 3      | 3      | 3       | 2      | 12    |
| ECs0183   | 3      | 3      | 3       | 2      | 2     |
| ECs0184   | 2      | 2      | 2       | 2      | 2     |
| ECs0185   | 2      | 2      | 2       | 2      | 2     |
| ECs0187   | 2      | 2      | 2       | 2      | 2     |
| ECs0188   | 2      | 2      | 2       | 2      | 2     |
| ECs0189   | 2      | 2      | 2       | 2      | 2     |
| ECs0191   | 2      | 2      | 2       | 2      | 2     |
| ECs0193   | 15     | 15     | 15      | 1      | 1     |
| ECs0194   | 2      | 2      | 2       | 2      | 2     |
| ECs0196   | 2      | 2      | 2       | 2      | 2     |
| ECs0197   | 2      | 2      | 2       | 2      | 2     |
| ECs0198   | 2      | 2      | 2       | 2      | 2     |
| ECs0199   | 2      | 2      | 2       | 2      | 2     |
| ECs0201   | 2      | 2      | 2       | 2      | 2     |
| ECs0202   | 2      | 2      | 2       | 2      | 2     |
| ECs0203   | 2      | 2      | 2       | 2      | 2     |
| ECs0204   | 2      | 2      | 2       | 2      | 2     |
| ECs0205   | 3      | 3      | 3       | 2      | 2     |
| ECs0207   | 2      | 2      | 2       | 2      | 2     |
| ECs0208   | 2      | 2      | 2       | 2      | 2     |
| ECs0209   | 3      | 3      | 3       | 2      | 2     |
| ECs0210   | 2      | 2      | 2       | 2      | 2     |
| ECs0211   | 2      | 2      | 2       | 2      | 2     |
| ECs0246   | 2      | 2      | 2       | 2      | 2     |
| ECs0247   | 2      | 2      | 2       | 2      | 2     |
| ECs0248   | 3      | 3      | 3       | 2      | 2     |
| ECs0249   | 2      | 2      | 2       | 2      | 2     |
| ECs0250   | 2      | 2      | 2       | 2      | 2     |
| ECs0258   | 2      | 2      | 2       | 23     | 23    |
| ECs0264   | 2      | 2      | 3       | 2      | 2     |
| ECs0265   | 2      | 2      | 2       | 2      | 2     |

| Locus tag | 258/98 | 493/89 | 3072/96 | EDL933 | Sakai |
|-----------|--------|--------|---------|--------|-------|
| ECs0266   | 3      | 3      | 3       | 2      | 2     |
| ECs0267   | 2      | 2      | 2       | 2      | 2     |
| ECs0269   | 2      | 2      | 2       | 2      | 2     |
| ECs0270   | 2      | 2      | 2       | 2      | 2     |
| ECs0396   | 2      | 2      | 2       | 2      | 2     |
| ECs0409   | 2      | 2      | 2       | 16     | 16    |
| ECs0410   | 3      | 3      | 3       | 2      | 2     |
| ECs0411   | 2      | 2      | 2       | 2      | 2     |
| ECs0412   | 2      | 2      | 2       | 2      | 2     |
| ECs0423   | 2      | 2      | 2       | 2      | 2     |
| ECs0431   | 2      | 2      | 2       | 2      | 2     |
| ECs0434   | 2      | 2      | 2       | 2      | 2     |
| ECs0435   | 2      | 2      | 2       | 2      | 2     |
| ECs0437   | 2      | 2      | 2       | 2      | 2     |
| ECs0436   | 2      | 2      | 2       | 2      | 2     |
| ECs0438   | 2      | 2      | 2       | 2      | 2     |
| ECs0439   | 2      | 2      | 2       | 2      | 2     |
| ECs0440   | 2      | 2      | 2       | 17     | 17    |
| ECs0441   | 2      | 2      | 2       | 2      | 2     |
| ECs0445   | 2      | 2      | 2       | 2      | 2     |
| ECs0444   | 2      | 2      | 2       | 2      | 2     |
| ECs0446   | 2      | 2      | 2       | 2      | 2     |
| ECs0447   | 3      | 3      | 3       | 2      | 31    |
| ECs0448   | 2      | 2      | 2       | 2      | 2     |
| ECs0449   | 1      | 1      | 1       | 1      | 1     |
| ECs0450   | 3      | 3      | 3       | 2      | 2     |
| ECs0451   | 3      | 3      | 3       | 2      | 2     |
| ECs0452   | 3      | 3      | 3       | 3      | 3     |
| ECs0455   | 2      | 2      | 2       | 2      | 2     |
| ECs0456   | 2      | 2      | 2       | 2      | 2     |
| ECs0457   | 3      | 3      | 3       | 2      | 2     |
| ECs0458   | 1      | 1      | 1       | 1      | 1     |
| ECs0459   | 3      | 3      | 3       | 2      | 2     |
| ECs0460   | 2      | 2      | 2       | 2      | 2     |
| ECs0463   | 2      | 2      | 2       | 2      | 2     |
| ECs0464   | 2      | 2      | 2       | 2      | 2     |
| ECs0466   | 2      | 2      | 2       | 2      | 2     |
| ECs0467   | 2      | 2      | 2       | 2      | 2     |
| ECs0468   | 2      | 2      | 2       | 2      | 2     |
| ECs0469   | 2      | 2      | 2       | 2      | 2     |
| ECs0470   | 2      | 2      | 2       | 2      | 2     |
| ECs0473   | 2      | 2      | 2       | 2      | 2     |
| ECs0474   | 2      | 2      | 2       | 2      | 2     |
| ECs0475   | 2      | 2      | 2       | 2      | 2     |
| ECs0476   | 2      | 2      | 2       | 2      | 2     |
| ECs0477   | 3      | 3      | 3       | 2      | 2     |
| ECs0479   | 3      | 3      | 3       | 2      | 2     |
| ECs0480   | 2      | 2      | 2       | 2      | 2     |
| ECs0481   | 2      | 2      | 2       | 2      | 2     |
| ECs0482   | 2      | 2      | 2       | 2      | 2     |
| ECs0483   | 2      | 2      | 2       | 2      | 2     |
| ECs0485   | 3      | 3      | 3       | 2      | 2     |
| ECs0487   | 3      | 3      | 3       | 2      | 2     |

| Locus tag | 258/98 | 493/89 | 3072/96 | EDL933 | Sakai |
|-----------|--------|--------|---------|--------|-------|
| ECs0488   | 2      | 2      | 2       | 2      | 2     |
| ECs0489   | 1      | 1      | 1       | 1      | 1     |
| ECs0490   | 3      | 3      | 3       | 2      | 2     |
| ECs0491   | 3      | 3      | 3       | 2      | 2     |
| ECs0492   | 2      | 2      | 2       | 2      | 2     |
| ECs0493   | 3      | 3      | 3       | 2      | 2     |
| ECs0494   | 2      | 2      | 2       | 2      | 2     |
| ECs0495   | 2      | 2      | 2       | 2      | 2     |
| ECs0496   | 2      | 2      | 2       | 2      | 2     |
| ECs0497   | 2      | 2      | 2       | 2      | 2     |
| ECs0498   | 2      | 2      | 2       | 2      | 2     |
| ECs0499   | 2      | 2      | 2       | 2      | 2     |
| ECs0501   | 2      | 2      | 2       | 2      | 2     |
| ECs0503   | 2      | 2      | 2       | 2      | 2     |
| ECs0504   | 2      | 2      | 2       | 2      | 2     |
| ECs0505   | 3      | 3      | 3       | 2      | 2     |
| ECs0506   | 2      | 2      | 2       | 2      | 2     |
| ECs0507   | 2      | 2      | 2       | 2      | 2     |
| ECs0508   | 2      | 2      | 2       | 2      | 2     |
| ECs0509   | 2      | 2      | 2       | 2      | 2     |
| ECs0510   | 2      | 2      | 2       | 2      | 2     |
| ECs0511   | 2      | 2      | 2       | 2      | 2     |
| ECs0512   | 2      | 2      | 2       | 2      | 2     |
| ECs0513   | 1      | 1      | 1       | 1      | 1     |
| ECs0514   | 2      | 2      | 2       | 2      | 2     |
| ECs0516   | 2      | 2      | 2       | 2      | 2     |
| ECs0517   | 2      | 2      | 2       | 11     | 11    |
| ECs0518   | 3      | 3      | 3       | 2      | 2     |
| ECs0520   | 3      | 3      | 3       | 2      | 2     |
| ECs0521   | 2      | 2      | 2       | 2      | 2     |
| ECs0522   | 2      | 2      | 2       | 2      | 2     |
| ECs0523   | 2      | 2      | 2       | 2      | 2     |
| ECs0524   | 2      | 2      | 2       | 2      | 2     |
| ECs0525   | 3      | 3      | 3       | 3      | 3     |
| ECs0526   | 3      | 3      | 3       | 2      | 2     |
| ECs0527   | 2      | 2      | 2       | 2      | 2     |
| ECs0528   | 2      | 2      | 2       | 2      | 2     |
| ECs0529   | 2      | 2      | 2       | 2      | 2     |
| ECs0530   | 2      | 2      | 2       | 2      | 2     |
| ECs0551   | 1      | 1      | 1       | 1      | 1     |
| ECs0552   | 2      | 2      | 2       | 2      | 2     |
| ECs0554   | 2      | 2      | 2       | 2      | 2     |
| ECs0576   | 2      | 2      | 2       | 2      | 2     |
| ECs0577   | 2      | 2      | 2       | 2      | 2     |
| ECs0579   | 2      | 2      | 2       | 2      | 2     |
| ECs0580   | 3      | 3      | 3       | 3      | 3     |
| ECs0581   | 3      | 3      | 3       | 2      | 2     |
| ECs0582   | 3      | 3      | 3       | 2      | 2     |
| ECs0583   | 3      | 3      | 3       | 2      | 2     |
| ECs0584   | 3      | 3      | 3       | 2      | 2     |
| ECs0585   | 2      | 2      | 2       | 2      | 2     |
| ECs0586   | 2      | 2      | 2       | 15     | 15    |
| ECs0587   | 2      | 2      | 2       | 2      | 2     |

| Locus tag | 258/98 | 493/89 | 3072/96 | EDL933 | Sakai |
|-----------|--------|--------|---------|--------|-------|
| ECs0588   | 2      | 2      | 2       | 2      | 2     |
| ECs0589   | 2      | 2      | 2       | 2      | 13    |
| ECs0590   | 2      | 2      | 2       | 2      | 2     |
| ECs0591   | 2      | 2      | 2       | 2      | 2     |
| ECs0696   | 2      | 2      | 2       | 2      | 2     |
| ECs0697   | 3      | 3      | 3       | 2      | 2     |
| ECs0698   | 3      | 3      | 3       | 2      | 2     |
| ECs0699   | 2      | 2      | 2       | 2      | 2     |
| ECs0700   | 2      | 2      | 2       | 2      | 2     |
| ECs0704   | 2      | 2      | 2       | 2      | 2     |
| ECs0705   | 3      | 3      | 3       | 2      | 2     |
| ECs0706   | 2      | 2      | 2       | 2      | 2     |
| ECs0707   | 2      | 2      | 2       | 2      | 2     |
| ECs0708   | 2      | 2      | 2       | 2      | 2     |
| ECs0709   | 2      | 2      | 2       | 2      | 2     |
| ECs0710   | 3      | 3      | 3       | 2      | 2     |
| ECs0713   | 2      | 2      | 2       | 2      | 2     |
| ECs0714   | 2      | 2      | 2       | 2      | 2     |
| ECs0715   | 2      | 2      | 2       | 2      | 2     |
| ECs0716   | 3      | 3      | 3       | 2      | 2     |
| ECs0717   | 3      | 3      | 3       | 2      | 2     |
| ECs0718   | 2      | 2      | 2       | 2      | 2     |
| ECs0719   | 3      | 3      | 3       | 24     | 24    |
| ECs0722   | 2      | 2      | 2       | 2      | 2     |
| ECs0723   | 3      | 3      | 3       | 2      | 2     |
| ECs0725   | 2      | 2      | 2       | 2      | 2     |
| ECs0726   | 3      | 3      | 3       | 2      | 2     |
| ECs0727   | 2      | 2      | 2       | 2      | 2     |
| ECs0728   | 2      | 2      | 2       | 2      | 2     |
| ECs0732   | 2      | 2      | 2       | 2      | 2     |
| ECs0733   | 2      | 2      | 2       | 2      | 2     |
| ECs0734   | 2      | 2      | 2       | 2      | 2     |
| ECs0735   | 2      | 2      | 2       | 2      | 2     |
| ECs0737   | 3      | 3      | 3       | 3      | 3     |
| ECs0739   | 2      | 2      | 2       | 2      | 2     |
| ECs0740   | 2      | 2      | 2       | 21     | 21    |
| ECs0745   | 2      | 2      | 2       | 2      | 2     |
| ECs0746   | 2      | 2      | 2       | 2      | 2     |
| ECs0748   | 3      | 3      | 3       | 2      | 2     |
| ECs0749   | 2      | 2      | 2       | 2      | 2     |
| ECs0751   | 3      | 3      | 3       | 21     | 21    |
| ECs0752   | 2      | 2      | 2       | 2      | 2     |
| ECs0753   | 2      | 2      | 2       | 2      | 2     |
| ECs0754   | 2      | 2      | 2       | 2      | 2     |
| ECs0769   | 2      | 2      | 2       | 2      | 2     |
| ECs5391   | 2      | 2      | 2       | 2      | 2     |
| ECs0770   | 2      | 2      | 2       | 2      | 2     |
| ECs0771   | 2      | 2      | 2       | 2      | 2     |
| ECs0772   | 2      | 2      | 2       | 2      | 2     |
| ECs0773   | 2      | 2      | 2       | 2      | 2     |
| ECs0775   | 2      | 2      | 2       | 2      | 2     |
| ECs0776   | 1      | 1      | 1       | 1      | 1     |
| ECs0777   | 2      | 2      | 2       | 2      | 2     |

| Locus tag | 258/98 | 493/89 | 3072/96 | EDL933 | Sakai |
|-----------|--------|--------|---------|--------|-------|
| ECs0778   | 2      | 2      | 2       | 2      | 2     |
| ECs0779   | 2      | 2      | 2       | 2      | 2     |
| ECs0781   | 2      | 2      | 2       | 2      | 2     |
| ECs0782   | 3      | 3      | 3       | 3      | 3     |
| ECs0783   | 2      | 2      | 2       | 2      | 2     |
| ECs0800   | 2      | 2      | 2       | 2      | 2     |
| ECs0851   | 2      | 2      | 2       | 2      | 2     |
| ECs0852   | 2      | 2      | 2       | 2      | 2     |
| ECs0853   | 3      | 3      | 3       | 2      | 2     |
| ECs0854   | 2      | 2      | 2       | 18     | 18    |
| ECs0856   | 2      | 2      | 2       | 13     | 13    |
| ECs0857   | 2      | 2      | 2       | 2      | 2     |
| ECs0858   | 2      | 2      | 2       | 2      | 2     |
| ECs0859   | 2      | 2      | 2       | 2      | 2     |
| ECs0860   | 2      | 2      | 2       | 2      | 2     |
| ECs0861   | 2      | 2      | 2       | 2      | 2     |
| ECs0863   | 3      | 3      | 3       | 14     | 14    |
| ECs0864   | 2      | 2      | 2       | 2      | 2     |
| ECs0866   | 3      | 3      | 3       | 2      | 2     |
| ECs0867   | 2      | 2      | 2       | 2      | 2     |
| ECs0868   | 2      | 2      | 2       | 2      | 2     |
| ECs0870   | 2      | 2      | 2       | 2      | 2     |
| ECs0872   | 2      | 2      | 2       | 2      | 2     |
| ECs0874   | 2      | 2      | 2       | 2      | 2     |
| ECs0875   | 2      | 2      | 2       | 2      | 2     |
| ECs0877   | 2      | 2      | 2       | 26     | 26    |
| ECs0878   | 2      | 2      | 2       | 2      | 2     |
| ECs0879   | 3      | 3      | 3       | 2      | 2     |
| ECs0880   | 2      | 2      | 2       | 2      | 2     |
| ECs0881   | 3      | 3      | 3       | 3      | 3     |
| ECs0882   | 2      | 2      | 2       | 2      | 2     |
| ECs0883   | 3      | 3      | 3       | 28     | 28    |
| ECs0884   | 2      | 2      | 2       | 2      | 2     |
| ECs0885   | 3      | 3      | 3       | 2      | 2     |
| ECs0886   | 3      | 3      | 3       | 2      | 2     |
| ECs0887   | 2      | 2      | 2       | 2      | 2     |
| ECs0888   | 2      | 2      | 2       | 2      | 2     |
| ECs0889   | 2      | 2      | 2       | 2      | 2     |
| ECs0890   | 2      | 2      | 2       | 2      | 2     |
| ECs0891   | 2      | 2      | 2       | 2      | 2     |
| ECs0892   | 2      | 2      | 2       | 2      | 2     |
| ECs0893   | 2      | 2      | 2       | 38     | 2     |
| ECs0894   | 2      | 2      | 2       | 2      | 2     |
| ECs0895   | 2      | 2      | 2       | 2      | 2     |
| ECs0896   | 2      | 2      | 2       | 2      | 2     |
| ECs0897   | 2      | 2      | 2       | 2      | 2     |
| ECs0899   | 2      | 2      | 2       | 2      | 2     |
| ECs0902   | 3      | 3      | 3       | 2      | 2     |
| ECs0903   | 2      | 2      | 2       | 2      | 2     |
| ECs0904   | 2      | 2      | 2       | 2      | 2     |
| ECs0905   | 3      | 3      | 3       | 2      | 2     |
| ECs0908   | 3      | 3      | 3       | 24     | 24    |
| ECs0909   | 2      | 2      | 2       | 2      | 2     |

| Locus tag | 258/98 | 493/89 | 3072/96 | EDL933 | Sakai |
|-----------|--------|--------|---------|--------|-------|
| ECs0910   | 3      | 3      | 3       | 2      | 2     |
| ECs0911   | 2      | 2      | 2       | 2      | 2     |
| ECs0913   | 2      | 2      | 2       | 22     | 22    |
| ECs0915   | 2      | 2      | 2       | 2      | 2     |
| ECs0916   | 1      | 1      | 1       | 1      | 1     |
| ECs0917   | 2      | 2      | 2       | 2      | 2     |
| ECs0918   | 3      | 3      | 3       | 3      | 3     |
| ECs0920   | 2      | 2      | 2       | 2      | 2     |
| ECs0921   | 2      | 2      | 2       | 2      | 2     |
| ECs0922   | 2      | 2      | 2       | 2      | 2     |
| ECs0925   | 2      | 2      | 2       | 2      | 2     |
| ECs0926   | 2      | 2      | 2       | 2      | 2     |
| ECs0927   | 3      | 3      | 3       | 2      | 2     |
| ECs0928   | 2      | 2      | 2       | 2      | 2     |
| ECs0929   | 2      | 2      | 2       | 2      | 2     |
| ECs0932   | 2      | 2      | 2       | 2      | 2     |
| ECs0933   | 2      | 2      | 2       | 2      | 2     |
| ECs0934   | 3      | 3      | 3       | 3      | 3     |
| ECs0935   | 2      | 2      | 2       | 2      | 2     |
| ECs0936   | 2      | 2      | 2       | 2      | 2     |
| ECs0937   | 3      | 3      | 3       | 2      | 2     |
| ECs0938   | 2      | 2      | 2       | 2      | 2     |
| ECs0939   | 1      | 1      | 1       | 1      | 1     |
| ECs0943   | 2      | 2      | 2       | 2      | 2     |
| ECs0944   | 2      | 2      | 2       | 2      | 2     |
| ECs0945   | 2      | 2      | 2       | 10     | 10    |
| ECs0946   | 2      | 2      | 2       | 2      | 2     |
| ECs0947   | 2      | 2      | 2       | 2      | 2     |
| ECs0952   | 2      | 2      | 2       | 2      | 2     |
| ECs0953   | 2      | 2      | 2       | 2      | 2     |
| ECs0954   | 3      | 3      | 3       | 2      | 2     |
| ECs0955   | 138    | 2      | 2       | 2      | 2     |
| ECs0956   | 3      | 3      | 3       | 2      | 2     |
| ECs0957   | 3      | 3      | 3       | 3      | 3     |
| ECs0958   | 3      | 3      | 3       | 16     | 16    |
| ECs0959   | 2      | 2      | 2       | 2      | 2     |
| ECs0961   | 3      | 3      | 3       | 2      | 2     |
| ECs0962   | 3      | 3      | 3       | 2      | 2     |
| ECs0963   | 2      | 2      | 2       | 2      | 2     |
| ECs0964   | 2      | 2      | 2       | 2      | 2     |
| ECs0965   | 2      | 2      | 2       | 2      | 2     |
| ECs0966   | 1      | 1      | 1       | 1      | 1     |
| ECs0967   | 1      | 1      | 1       | 1      | 1     |
| ECs0969   | 1      | 1      | 1       | 1      | 1     |
| ECs0970   | 2      | 2      | 2       | 2      | 2     |
| ECs0971   | 3      | 3      | 3       | 22     | 22    |
| ECs0972   | 2      | 2      | 2       | 2      | 2     |
| ECs0973   | 2      | 2      | 2       | 2      | 2     |
| ECs0974   | 3      | 3      | 3       | 2      | 2     |
| ECs0976   | 1      | 1      | 1       | 1      | 1     |
| ECs0977   | 2      | 2      | 2       | 2      | 2     |
| ECs0978   | 2      | 2      | 2       | 2      | 2     |
| ECs0979   | 3      | 3      | 3       | 2      | 2     |



| Locus tag | 258/98 | 493/89 | 3072/96 | EDL933 | Sakai |
|-----------|--------|--------|---------|--------|-------|
| ECs0980   | 2      | 2      | 2       | 2      | 2     |
| ECs0981   | 114    | 2      | 2       | 2      | 2     |
| ECs0983   | 2      | 2      | 2       | 2      | 2     |
| ECs0985   | 3      | 3      | 3       | 2      | 2     |
| ECs0987   | 2      | 2      | 2       | 2      | 2     |
| ECs0988   | 3      | 3      | 3       | 2      | 2     |
| ECs0989   | 2      | 2      | 2       | 2      | 2     |
| ECs0990   | 3      | 3      | 3       | 2      | 2     |
| ECs0991   | 2      | 2      | 2       | 2      | 2     |
| ECs0993   | 2      | 2      | 2       | 2      | 2     |
| ECs0994   | 2      | 2      | 2       | 2      | 2     |
| ECs0995   | 1      | 1      | 1       | 1      | 1     |
| ECs0996   | 3      | 3      | 3       | 26     | 26    |
| ECs0997   | 2      | 2      | 2       | 2      | 2     |
| ECs0998   | 2      | 2      | 2       | 2      | 2     |
| ECs1000   | 2      | 2      | 2       | 2      | 2     |
| ECs1001   | 2      | 3      | 2       | 2      | 2     |
| ECs1002   | 3      | 3      | 3       | 2      | 2     |
| ECs1004   | 3      | 3      | 3       | 2      | 2     |
| ECs1005   | 2      | 2      | 2       | 2      | 2     |
| ECs1007   | 2      | 2      | 2       | 2      | 2     |
| ECs1008   | 3      | 3      | 3       | 2      | 2     |
| ECs1009   | 2      | 2      | 2       | 2      | 2     |
| ECs1010   | 2      | 2      | 2       | 2      | 2     |
| ECs1011   | 3      | 3      | 3       | 2      | 2     |
| ECs1013   | 2      | 2      | 2       | 2      | 2     |
| ECs1014   | 3      | 3      | 3       | 2      | 2     |
| ECs1015   | 3      | 3      | 3       | 2      | 2     |
| ECs1017   | 2      | 2      | 2       | 12     | 12    |
| ECs1018   | 2      | 2      | 2       | 2      | 2     |
| ECs1029   | 2      | 2      | 2       | 2      | 2     |
| ECs1030   | 2      | 2      | 2       | 2      | 2     |
| ECs1031   | 2      | 2      | 2       | 2      | 2     |
| ECs1032   | 3      | 3      | 3       | 2      | 2     |
| ECs1033   | 3      | 3      | 3       | 2      | 2     |
| ECs1034   | 3      | 3      | 3       | 2      | 2     |
| ECs1035   | 2      | 2      | 2       | 2      | 2     |
| ECs1036   | 2      | 2      | 2       | 2      | 2     |
| ECs1037   | 1      | 1      | 1       | 1      | 1     |
| ECs1038   | 2      | 2      | 2       | 2      | 2     |
| ECs1039   | 2      | 2      | 2       | 2      | 2     |
| ECs1040   | 2      | 2      | 2       | 2      | 2     |
| ECs1041   | 2      | 2      | 2       | 2      | 2     |
| ECs1042   | 1      | 1      | 1       | 1      | 1     |
| ECs1044   | 2      | 2      | 2       | 42     | 2     |
| ECs1045   | 2      | 2      | 2       | 2      | 2     |
| ECs1046   | 2      | 2      | 2       | 2      | 2     |
| ECs1047   | 2      | 2      | 2       | 2      | 2     |
| ECs1049   | 3      | 3      | 3       | 3      | 3     |
| ECs1050   | 2      | 2      | 2       | 2      | 2     |
| ECs1051   | 128    | 2      | 2       | 2      | 2     |
| ECs1052   | 2      | 2      | 2       | 2      | 2     |
| ECs1053   | 2      | 2      | 2       | 2      | 2     |

| Locus tag | 258/98 | 493/89 | 3072/96 | EDL933 | Sakai |
|-----------|--------|--------|---------|--------|-------|
| ECs1054   | 2      | 2      | 2       | 2      | 2     |
| ECs1128   | 2      | 2      | 2       | 2      | 2     |
| ECs1130   | 2      | 2      | 2       | 2      | 2     |
| ECs1131   | 2      | 2      | 2       | 2      | 2     |
| ECs1132   | 2      | 2      | 2       | 2      | 2     |
| ECs1133   | 2      | 2      | 2       | 2      | 2     |
| ECs1134   | 2      | 2      | 3       | 2      | 2     |
| ECs1135   | 2      | 2      | 2       | 2      | 2     |
| ECs1136   | 2      | 2      | 2       | 2      | 2     |
| ECs1144   | 2      | 2      | 2       | 2      | 2     |
| ECs1145   | 3      | 3      | 3       | 3      | 3     |
| ECs1147   | 2      | 2      | 2       | 2      | 2     |
| ECs1148   | 3      | 3      | 3       | 2      | 2     |
| ECs1149   | 2      | 2      | 2       | 2      | 2     |
| ECs1151   | 2      | 2      | 2       | 2      | 2     |
| ECs1152   | 3      | 3      | 3       | 2      | 2     |
| ECs1153   | 2      | 2      | 2       | 2      | 2     |
| ECs1154   | 2      | 2      | 2       | 2      | 2     |
| ECs1155   | 2      | 2      | 2       | 2      | 2     |
| ECs1159   | 2      | 2      | 2       | 2      | 2     |
| ECs5596   | 3      | 3      | 3       | 2      | 2     |
| ECs1253   | 3      | 3      | 3       | 2      | 2     |
| ECs1254   | 2      | 2      | 2       | 2      | 2     |
| ECs1255   | 2      | 2      | 2       | 2      | 2     |
| ECs1257   | 3      | 3      | 3       | 17     | 17    |
| ECs1259   | 2      | 2      | 2       | 2      | 2     |
| ECs1260   | 2      | 2      | 2       | 2      | 29    |
| ECs5411   | 2      | 2      | 2       | 2      | 2     |
| ECs1261   | 3      | 3      | 3       | 2      | 2     |
| ECs1263   | 2      | 2      | 3       | 2      | 2     |
| ECs1264   | 2      | 2      | 2       | 2      | 2     |
| ECs1265   | 3      | 3      | 3       | 17     | 17    |
| ECs1266   | 2      | 2      | 2       | 2      | 2     |
| ECs1422   | 2      | 2      | 2       | 2      | 2     |
| ECs1424   | 4      | 4      | 3       | 4      | 4     |
| ECs1425   | 3      | 3      | 3       | 3      | 3     |
| ECs1428   | 2      | 2      | 2       | 2      | 2     |
| ECs1429   | 2      | 2      | 2       | 2      | 2     |
| ECs1431   | 2      | 2      | 2       | 2      | 2     |
| ECs1432   | 2      | 2      | 2       | 2      | 2     |
| ECs1433   | 2      | 2      | 2       | 2      | 2     |
| ECs1434   | 3      | 3      | 3       | 10     | 10    |
| ECs1435   | 2      | 2      | 2       | 2      | 2     |
| ECs1436   | 2      | 2      | 2       | 2      | 2     |
| ECs1437   | 2      | 2      | 2       | 2      | 2     |
| ECs1438   | 2      | 2      | 2       | 2      | 2     |
| ECs1440   | 3      | 3      | 3       | 2      | 2     |
| ECs1441   | 2      | 2      | 2       | 2      | 2     |
| ECs1442   | 2      | 2      | 2       | 2      | 2     |
| ECs1443   | 2      | 2      | 2       | 2      | 2     |
| ECs1444   | 2      | 2      | 2       | 2      | 2     |
| ECs1445   | 2      | 2      | 2       | 2      | 2     |
| ECs1446   | 2      | 2      | 2       | 2      | 2     |

| Locus tag | 258/98 | 493/89 | 3072/96 | EDL933 | Sakai |
|-----------|--------|--------|---------|--------|-------|
| ECs1447   | 2      | 2      | 2       | 2      | 2     |
| ECs1462   | 2      | 2      | 2       | 2      | 25    |
| ECs1463   | 1      | 1      | 1       | 1      | 1     |
| ECs1464   | 3      | 3      | 3       | 2      | 2     |
| ECs1465   | 2      | 2      | 3       | 2      | 13    |
| ECs1466   | 2      | 2      | 2       | 2      | 2     |
| ECs1467   | 1      | 1      | 1       | 1      | 1     |
| ECs1468   | 2      | 2      | 2       | 2      | 2     |
| ECs1469   | 2      | 2      | 2       | 2      | 2     |
| ECs1470   | 2      | 2      | 2       | 2      | 2     |
| ECs1471   | 3      | 3      | 3       | 2      | 2     |
| ECs1472   | 1      | 1      | 1       | 2      | 2     |
| ECs1473   | 2      | 2      | 2       | 2      | 2     |
| ECs1474   | 2      | 2      | 2       | 2      | 2     |
| ECs1475   | 2      | 2      | 2       | 2      | 2     |
| ECs1477   | 2      | 2      | 2       | 2      | 2     |
| ECs1478   | 2      | 2      | 2       | 2      | 2     |
| ECs1479   | 2      | 2      | 2       | 2      | 2     |
| ECs1480   | 128    | 2      | 2       | 2      | 2     |
| ECs1481   | 2      | 2      | 2       | 2      | 2     |
| ECs1482   | 2      | 2      | 2       | 2      | 2     |
| ECs1484   | 3      | 3      | 3       | 18     | 18    |
| ECs1485   | 3      | 3      | 3       | 2      | 2     |
| ECs1486   | 2      | 2      | 2       | 2      | 2     |
| ECs1487   | 2      | 2      | 2       | 2      | 2     |
| ECs1488   | 2      | 2      | 2       | 2      | 2     |
| ECs1489   | 2      | 2      | 2       | 2      | 2     |
| ECs1490   | 1      | 1      | 1       | 1      | 1     |
| ECs1491   | 2      | 2      | 3       | 2      | 2     |
| ECs1492   | 3      | 3      | 3       | 2      | 2     |
| ECs1493   | 3      | 3      | 3       | 2      | 2     |
| ECs1494   | 2      | 2      | 2       | 2      | 2     |
| ECs1496   | 2      | 2      | 2       | 2      | 20    |
| ECs1498   | 2      | 2      | 2       | 2      | 2     |
| ECs1499   | 3      | 3      | 3       | 2      | 2     |
| ECs1500   | 3      | 3      | 3       | 2      | 2     |
| ECs1571   | 2      | 2      | 2       | 2      | 2     |
| ECs1573   | 2      | 2      | 2       | 2      | 2     |
| ECs1601   | 2      | 2      | 2       | 2      | 2     |
| ECs1602   | 2      | 2      | 2       | 2      | 2     |
| ECs1603   | 2      | 2      | 2       | 35     | 2     |
| ECs1604   | 2      | 2      | 2       | 2      | 2     |
| ECs1605   | 3      | 3      | 3       | 2      | 2     |
| ECs1606   | 3      | 3      | 3       | 2      | 2     |
| ECs1607   | 2      | 2      | 2       | 2      | 2     |
| ECs1608   | 2      | 136    | 2       | 2      | 2     |
| ECs1668   | 2      | 2      | 2       | 2      | 2     |
| ECs1669   | 2      | 2      | 2       | 2      | 2     |
| ECs1670   | 2      | 2      | 2       | 2      | 2     |
| ECs1671   | 2      | 2      | 2       | 2      | 2     |
| ECs1673   | 1      | 1      | 1       | 1      | 1     |
| ECs1674   | 1      | 1      | 1       | 1      | 1     |
| ECs1675   | 2      | 2      | 2       | 2      | 2     |

| Locus tag | 258/98 | 493/89 | 3072/96 | EDL933 | Sakai |
|-----------|--------|--------|---------|--------|-------|
| ECs1676   | 2      | 2      | 2       | 2      | 2     |
| ECs1678   | 2      | 2      | 2       | 2      | 2     |
| ECs1679   | 2      | 2      | 2       | 2      | 2     |
| ECs1680   | 2      | 2      | 2       | 2      | 2     |
| ECs1681   | 3      | 3      | 3       | 2      | 2     |
| ECs1682   | 2      | 2      | 2       | 2      | 2     |
| ECs1683   | 2      | 2      | 2       | 2      | 2     |
| ECs1684   | 3      | 3      | 3       | 3      | 3     |
| ECs1686   | 2      | 2      | 2       | 2      | 2     |
| ECs1688   | 2      | 2      | 2       | 2      | 2     |
| ECs1708   | 2      | 2      | 2       | 2      | 2     |
| ECs1709   | 3      | 3      | 3       | 2      | 2     |
| ECs1710   | 31     | 1      | 1       | 1      | 1     |
| ECs1711   | 2      | 2      | 2       | 2      | 2     |
| ECs1712   | 2      | 2      | 2       | 2      | 2     |
| ECs1713   | 3      | 3      | 3       | 2      | 2     |
| ECs1714   | 2      | 2      | 2       | 2      | 2     |
| ECs1715   | 2      | 2      | 2       | 2      | 2     |
| ECs1716   | 2      | 2      | 2       | 2      | 2     |
| ECs1717   | 2      | 2      | 2       | 2      | 2     |
| ECs1718   | 2      | 2      | 2       | 2      | 2     |
| ECs1719   | 2      | 2      | 2       | 2      | 2     |
| ECs1720   | 3      | 3      | 3       | 2      | 2     |
| ECs1722   | 2      | 2      | 2       | 2      | 2     |
| ECs1724   | 3      | 3      | 3       | 3      | 3     |
| ECs1725   | 2      | 2      | 2       | 2      | 2     |
| ECs1727   | 3      | 3      | 3       | 2      | 2     |
| ECs5423   | 3      | 3      | 3       | 2      | 2     |
| ECs1728   | 3      | 3      | 3       | 21     | 21    |
| ECs1729   | 2      | 2      | 2       | 2      | 2     |
| ECs1730   | 3      | 3      | 3       | 2      | 2     |
| ECs1731   | 2      | 2      | 2       | 2      | 2     |
| ECs1732   | 2      | 2      | 2       | 2      | 2     |
| ECs1734   | 2      | 2      | 2       | 2      | 2     |
| ECs1735   | 2      | 2      | 2       | 2      | 2     |
| ECs1736   | 2      | 2      | 2       | 2      | 2     |
| ECs1737   | 2      | 2      | 2       | 2      | 2     |
| ECs1738   | 2      | 2      | 2       | 2      | 2     |
| ECs1739   | 2      | 2      | 2       | 2      | 2     |
| ECs1740   | 3      | 3      | 3       | 2      | 2     |
| ECs1741   | 3      | 3      | 3       | 2      | 2     |
| ECs1742   | 2      | 2      | 2       | 2      | 2     |
| ECs1743   | 3      | 3      | 3       | 2      | 2     |
| ECs1745   | 2      | 2      | 2       | 19     | 19    |
| ECs1746   | 2      | 2      | 2       | 2      | 2     |
| ECs1747   | 2      | 2      | 2       | 2      | 2     |
| ECs1748   | 2      | 2      | 2       | 2      | 2     |
| ECs1749   | 2      | 2      | 2       | 2      | 2     |
| ECs5426   | 2      | 2      | 2       | 2      | 2     |
| ECs1750   | 2      | 2      | 2       | 2      | 2     |
| ECs1751   | 1      | 1      | 1       | 1      | 1     |
| ECs1752   | 2      | 2      | 2       | 2      | 2     |
| ECs1753   | 2      | 2      | 2       | 2      | 2     |

| Locus tag | 258/98 | 493/89 | 3072/96 | EDL933 | Sakai |
|-----------|--------|--------|---------|--------|-------|
| ECs1754   | 2      | 2      | 2       | 2      | 2     |
| ECs1755   | 2      | 2      | 2       | 2      | 2     |
| ECs1832   | 3      | 3      | 3       | 2      | 2     |
| ECs1834   | 2      | 2      | 2       | 2      | 2     |
| ECs1835   | 2      | 2      | 3       | 2      | 2     |
| ECs1836   | 3      | 3      | 3       | 2      | 2     |
| ECs1838   | 2      | 2      | 2       | 2      | 2     |
| ECs1841   | 2      | 2      | 2       | 2      | 2     |
| ECs1842   | 3      | 3      | 3       | 2      | 2     |
| ECs1843   | 2      | 2      | 2       | 2      | 2     |
| ECs1844   | 3      | 3      | 3       | 2      | 2     |
| ECs1845   | 2      | 2      | 2       | 2      | 2     |
| ECs1846   | 2      | 2      | 2       | 2      | 2     |
| ECs1847   | 3      | 3      | 3       | 2      | 2     |
| ECs1849   | 3      | 3      | 3       | 2      | 2     |
| ECs1850   | 2      | 2      | 2       | 2      | 2     |
| ECs1851   | 2      | 2      | 2       | 2      | 2     |
| ECs1852   | 2      | 2      | 2       | 2      | 2     |
| ECs1853   | 2      | 2      | 2       | 2      | 2     |
| ECs1854   | 2      | 2      | 2       | 2      | 2     |
| ECs1855   | 2      | 2      | 2       | 2      | 2     |
| ECs1856   | 2      | 2      | 2       | 2      | 2     |
| ECs1857   | 2      | 2      | 2       | 2      | 2     |
| ECs5432   | 1      | 1      | 1       | 2      | 2     |
| ECs1859   | 2      | 2      | 2       | 2      | 2     |
| ECs1860   | 3      | 3      | 3       | 2      | 2     |
| ECs1861   | 2      | 2      | 2       | 2      | 2     |
| ECs1867   | 2      | 2      | 2       | 2      | 2     |
| ECs1868   | 2      | 2      | 2       | 2      | 2     |
| ECs1870   | 2      | 2      | 2       | 2      | 2     |
| ECs1871   | 3      | 3      | 3       | 2      | 2     |
| ECs1872   | 2      | 2      | 2       | 2      | 2     |
| ECs1880   | 2      | 2      | 2       | 2      | 2     |
| ECs1881   | 2      | 2      | 2       | 2      | 2     |
| ECs1882   | 2      | 2      | 2       | 2      | 2     |
| ECs1883   | 2      | 2      | 2       | 2      | 2     |
| ECs1884   | 2      | 2      | 2       | 2      | 2     |
| ECs1885   | 2      | 2      | 2       | 2      | 2     |
| ECs1900   | 2      | 2      | 2       | 2      | 2     |
| ECs1901   | 3      | 3      | 3       | 4      | 4     |
| ECs1902   | 2      | 2      | 2       | 2      | 2     |
| ECs1903   | 2      | 2      | 2       | 2      | 2     |
| ECs1915   | 86     | 3      | 3       | 3      | 3     |
| ECs1916   | 2      | 2      | 2       | 2      | 2     |
| ECs2014   | 1      | 1      | 1       | 1      | 1     |
| ECs2015   | 2      | 2      | 2       | 1      | 1     |
| ECs2020   | 111    | 2      | 2       | 2      | 2     |
| ECs2106   | 228    | 3      | 3       | 2      | 2     |
| ECs2128   | 2      | 2      | 2       | 44     | 2     |
| ECs2132   | 3      | 3      | 3       | 20     | 20    |
| ECs2135   | 3      | 3      | 3       | 3      | 3     |
| ECs2136   | 3      | 3      | 3       | 2      | 2     |
| ECs2137   | 2      | 2      | 2       | 2      | 2     |

| Locus tag | 258/98 | 493/89 | 3072/96 | EDL933 | Sakai |
|-----------|--------|--------|---------|--------|-------|
| ECs2138   | 2      | 2      | 2       | 2      | 2     |
| ECs2139   | 2      | 2      | 2       | 2      | 2     |
| ECs2288   | 3      | 3      | 3       | 2      | 2     |
| ECs2289   | 2      | 2      | 2       | 2      | 2     |
| ECs2290   | 3      | 3      | 3       | 2      | 2     |
| ECs2291   | 2      | 2      | 2       | 2      | 2     |
| ECs2292   | 2      | 2      | 2       | 2      | 2     |
| ECs2297   | 2      | 2      | 2       | 2      | 2     |
| ECs2300   | 2      | 2      | 2       | 2      | 2     |
| ECs2301   | 2      | 2      | 2       | 2      | 2     |
| ECs2302   | 2      | 2      | 2       | 2      | 2     |
| ECs2308   | 2      | 2      | 2       | 2      | 2     |
| ECs2309   | 3      | 3      | 3       | 2      | 2     |
| ECs2311   | 2      | 2      | 2       | 2      | 2     |
| ECs2312   | 2      | 2      | 2       | 2      | 2     |
| ECs2313   | 1      | 1      | 1       | 1      | 1     |
| ECs2314   | 3      | 3      | 3       | 2      | 2     |
| ECs2316   | 2      | 2      | 2       | 2      | 2     |
| ECs2317   | 2      | 2      | 2       | 2      | 2     |
| ECs2318   | 2      | 2      | 2       | 2      | 2     |
| ECs2319   | 3      | 3      | 3       | 2      | 2     |
| ECs2320   | 3      | 3      | 3       | 21     | 21    |
| ECs2326   | 3      | 3      | 3       | 2      | 2     |
| ECs2327   | 2      | 28     | 2       | 2      | 2     |
| ECs2328   | 3      | 3      | 3       | 3      | 3     |
| ECs2329   | 90     | 2      | 2       | 2      | 2     |
| ECs2330   | 2      | 2      | 2       | 2      | 2     |
| ECs2331   | 2      | 2      | 2       | 2      | 2     |
| ECs2332   | 3      | 3      | 3       | 3      | 3     |
| ECs2334   | 2      | 2      | 2       | 2      | 2     |
| ECs2335   | 2      | 16     | 2       | 2      | 2     |
| ECs2336   | 2      | 2      | 2       | 2      | 2     |
| ECs2339   | 2      | 2      | 2       | 2      | 2     |
| ECs2340   | 2      | 2      | 2       | 2      | 2     |
| ECs2341   | 2      | 2      | 2       | 2      | 2     |
| ECs2342   | 3      | 3      | 3       | 2      | 2     |
| ECs2343   | 3      | 3      | 3       | 3      | 3     |
| ECs2344   | 2      | 2      | 2       | 2      | 2     |
| ECs2345   | 2      | 2      | 2       | 2      | 2     |
| ECs2346   | 2      | 2      | 2       | 2      | 2     |
| ECs2347   | 2      | 2      | 2       | 2      | 2     |
| ECs2348   | 2      | 2      | 2       | 2      | 2     |
| ECs2349   | 3      | 3      | 3       | 2      | 2     |
| ECs2350   | 2      | 2      | 2       | 2      | 2     |
| ECs2351   | 2      | 2      | 2       | 8      | 8     |
| ECs2352   | 2      | 2      | 2       | 2      | 2     |
| ECs2353   | 2      | 2      | 2       | 2      | 2     |
| ECs2355   | 2      | 2      | 2       | 2      | 2     |
| ECs2357   | 3      | 3      | 3       | 3      | 3     |
| ECs2359   | 2      | 2      | 2       | 2      | 2     |
| ECs2360   | 2      | 2      | 2       | 2      | 2     |
| ECs2361   | 3      | 3      | 3       | 2      | 2     |
| ECs2363   | 2      | 2      | 2       | 2      | 2     |

| Locus tag | 258/98 | 493/89 | 3072/96 | EDL933 | Sakai |
|-----------|--------|--------|---------|--------|-------|
| ECs2364   | 2      | 2      | 2       | 8      | 8     |
| ECs2365   | 2      | 2      | 2       | 2      | 2     |
| ECs2366   | 3      | 3      | 3       | 2      | 2     |
| ECs2367   | 3      | 3      | 3       | 2      | 2     |
| ECs2368   | 134    | 2      | 2       | 2      | 2     |
| ECs2369   | 3      | 3      | 3       | 2      | 2     |
| ECs2370   | 2      | 2      | 2       | 2      | 2     |
| ECs2371   | 3      | 3      | 3       | 2      | 2     |
| ECs2373   | 3      | 3      | 3       | 20     | 20    |
| ECs2374   | 3      | 3      | 3       | 2      | 2     |
| ECs2375   | 3      | 3      | 3       | 2      | 2     |
| ECs2376   | 2      | 2      | 2       | 2      | 2     |
| ECs2377   | 2      | 2      | 2       | 2      | 2     |
| ECs2378   | 3      | 3      | 3       | 3      | 3     |
| ECs2379   | 2      | 2      | 2       | 2      | 2     |
| ECs2382   | 2      | 2      | 2       | 1      | 1     |
| ECs2383   | 3      | 3      | 3       | 3      | 3     |
| ECs2384   | 1      | 1      | 1       | 1      | 1     |
| ECs2385   | 3      | 3      | 3       | 2      | 2     |
| ECs2386   | 2      | 2      | 2       | 2      | 2     |
| ECs2387   | 2      | 2      | 2       | 2      | 2     |
| ECs2388   | 2      | 2      | 2       | 2      | 2     |
| ECs2392   | 2      | 2      | 2       | 2      | 2     |
| ECs2393   | 2      | 2      | 2       | 2      | 2     |
| ECs2394   | 3      | 3      | 3       | 2      | 2     |
| ECs2395   | 2      | 2      | 2       | 2      | 2     |
| ECs2396   | 2      | 2      | 2       | 2      | 2     |
| ECs2397   | 145    | 3      | 3       | 3      | 3     |
| ECs2398   | 3      | 3      | 3       | 24     | 24    |
| ECs2399   | 3      | 3      | 3       | 2      | 2     |
| ECs2400   | 2      | 2      | 2       | 2      | 2     |
| ECs2409   | 3      | 3      | 3       | 54     | 2     |
| ECs2410   | 2      | 2      | 2       | 2      | 2     |
| ECs2411   | 2      | 2      | 2       | 2      | 2     |
| ECs2412   | 1      | 1      | 1       | 1      | 1     |
| ECs2413   | 3      | 3      | 3       | 2      | 2     |
| ECs2414   | 3      | 3      | 3       | 2      | 2     |
| ECs2415   | 2      | 2      | 2       | 2      | 2     |
| ECs2416   | 2      | 2      | 2       | 2      | 2     |
| ECs2417   | 2      | 2      | 2       | 2      | 2     |
| ECs2418   | 2      | 2      | 2       | 2      | 2     |
| ECs2419   | 1      | 1      | 1       | 1      | 1     |
| ECs2420   | 3      | 3      | 3       | 2      | 2     |
| ECs2421   | 2      | 2      | 2       | 2      | 2     |
| ECs2423   | 2      | 2      | 2       | 2      | 2     |
| ECs2424   | 1      | 1      | 1       | 1      | 1     |
| ECs2425   | 2      | 2      | 2       | 2      | 2     |
| ECs2426   | 2      | 2      | 2       | 2      | 2     |
| ECs2428   | 3      | 3      | 3       | 14     | 14    |
| ECs2429   | 2      | 2      | 2       | 2      | 2     |
| ECs2430   | 2      | 2      | 2       | 2      | 2     |
| ECs2431   | 3      | 3      | 3       | 2      | 2     |
| ECs2432   | 3      | 3      | 3       | 30     | 2     |

| Locus tag | 258/98 | 493/89 | 3072/96 | EDL933 | Sakai |
|-----------|--------|--------|---------|--------|-------|
| ECs2433   | 3      | 3      | 3       | 3      | 3     |
| ECs2434   | 2      | 2      | 2       | 2      | 2     |
| ECs2435   | 2      | 2      | 2       | 16     | 16    |
| ECs2438   | 2      | 2      | 2       | 2      | 2     |
| ECs2440   | 2      | 2      | 2       | 2      | 2     |
| ECs2441   | 2      | 2      | 2       | 2      | 2     |
| ECs2442   | 2      | 2      | 2       | 13     | 13    |
| ECs2443   | 2      | 2      | 2       | 1      | 1     |
| ECs2444   | 1      | 1      | 1       | 1      | 1     |
| ECs2445   | 2      | 2      | 2       | 2      | 2     |
| ECs2446   | 3      | 3      | 3       | 2      | 2     |
| ECs2447   | 74     | 2      | 2       | 2      | 2     |
| ECs2449   | 2      | 2      | 2       | 2      | 2     |
| ECs2451   | 2      | 2      | 2       | 20     | 20    |
| ECs2452   | 3      | 3      | 3       | 2      | 2     |
| ECs2453   | 3      | 3      | 3       | 2      | 2     |
| ECs2454   | 3      | 3      | 3       | 3      | 3     |
| ECs2455   | 3      | 3      | 3       | 2      | 2     |
| ECs2456   | 2      | 2      | 2       | 2      | 2     |
| ECs2458   | 2      | 2      | 2       | 2      | 2     |
| ECs2459   | 2      | 2      | 2       | 2      | 2     |
| ECs2461   | 2      | 2      | 2       | 2      | 2     |
| ECs2462   | 3      | 3      | 3       | 3      | 3     |
| ECs2463   | 3      | 3      | 3       | 2      | 2     |
| ECs2464   | 2      | 2      | 2       | 2      | 2     |
| ECs2465   | 3      | 3      | 3       | 2      | 2     |
| ECs2467   | 3      | 3      | 3       | 3      | 3     |
| ECs2470   | 3      | 3      | 3       | 3      | 3     |
| ECs2471   | 2      | 2      | 2       | 2      | 2     |
| ECs2472   | 3      | 3      | 3       | 2      | 2     |
| ECs2474   | 2      | 2      | 2       | 2      | 2     |
| ECs2475   | 3      | 3      | 3       | 3      | 3     |
| ECs2486   | 2      | 2      | 2       | 2      | 2     |
| ECs2487   | 2      | 2      | 2       | 2      | 2     |
| ECs2488   | 2      | 2      | 2       | 2      | 2     |
| ECs2489   | 2      | 2      | 2       | 2      | 2     |
| ECs2490   | 2      | 2      | 2       | 2      | 2     |
| ECs2491   | 3      | 3      | 3       | 2      | 2     |
| ECs2492   | 2      | 2      | 2       | 2      | 2     |
| ECs2493   | 2      | 2      | 2       | 2      | 2     |
| ECs2497   | 2      | 2      | 2       | 2      | 2     |
| ECs2499   | 3      | 3      | 3       | 3      | 3     |
| ECs2500   | 2      | 2      | 2       | 2      | 2     |
| ECs2501   | 2      | 2      | 2       | 2      | 2     |
| ECs2502   | 2      | 2      | 2       | 2      | 2     |
| ECs2504   | 2      | 2      | 2       | 2      | 2     |
| ECs2507   | 2      | 2      | 2       | 2      | 2     |
| ECs2513   | 2      | 2      | 2       | 2      | 2     |
| ECs2514   | 3      | 3      | 3       | 2      | 2     |
| ECs2515   | 2      | 2      | 2       | 2      | 2     |
| ECs2516   | 2      | 2      | 2       | 2      | 2     |
| ECs2517   | 3      | 3      | 3       | 2      | 2     |
| ECs2518   | 2      | 2      | 2       | 2      | 2     |



| Locus tag | 258/98 | 493/89 | 3072/96 | EDL933 | Sakai |
|-----------|--------|--------|---------|--------|-------|
| ECs2522   | 2      | 2      | 2       | 2      | 2     |
| ECs2523   | 2      | 2      | 2       | 2      | 2     |
| ECs2524   | 169    | 2      | 2       | 2      | 2     |
| ECs2525   | 3      | 3      | 3       | 3      | 3     |
| ECs2528   | 2      | 2      | 2       | 2      | 2     |
| ECs2529   | 2      | 2      | 2       | 2      | 2     |
| ECs2530   | 2      | 2      | 2       | 2      | 2     |
| ECs2531   | 2      | 2      | 2       | 2      | 2     |
| ECs2532   | 2      | 2      | 2       | 2      | 2     |
| ECs2533   | 2      | 2      | 2       | 2      | 2     |
| ECs2534   | 1      | 1      | 1       | 1      | 1     |
| ECs2535   | 3      | 3      | 3       | 2      | 2     |
| ECs2536   | 2      | 2      | 2       | 2      | 2     |
| ECs5463   | 2      | 2      | 2       | 2      | 2     |
| ECs2538   | 2      | 2      | 2       | 2      | 2     |
| ECs2539   | 2      | 2      | 2       | 2      | 2     |
| ECs2540   | 2      | 2      | 2       | 2      | 2     |
| ECs2542   | 2      | 2      | 2       | 2      | 2     |
| ECs2544   | 3      | 3      | 3       | 2      | 2     |
| ECs2545   | 2      | 2      | 2       | 2      | 2     |
| ECs2546   | 2      | 2      | 2       | 2      | 2     |
| ECs2547   | 2      | 2      | 2       | 2      | 2     |
| ECs2548   | 2      | 2      | 2       | 2      | 2     |
| ECs2549   | 2      | 2      | 2       | 2      | 2     |
| ECs2550   | 2      | 2      | 2       | 2      | 2     |
| ECs2551   | 2      | 2      | 2       | 2      | 2     |
| ECs2552   | 2      | 2      | 2       | 2      | 2     |
| ECs2553   | 2      | 2      | 2       | 2      | 2     |
| ECs2554   | 3      | 3      | 3       | 15     | 15    |
| ECs2555   | 3      | 3      | 3       | 2      | 2     |
| ECs2556   | 2      | 2      | 2       | 2      | 2     |
| ECs2557   | 2      | 2      | 2       | 2      | 2     |
| ECs2558   | 2      | 2      | 2       | 2      | 2     |
| ECs2559   | 2      | 2      | 2       | 2      | 2     |
| ECs2560   | 2      | 2      | 2       | 2      | 2     |
| ECs2561   | 2      | 2      | 2       | 2      | 2     |
| ECs2562   | 2      | 2      | 2       | 2      | 2     |
| ECs2563   | 2      | 2      | 2       | 2      | 2     |
| ECs2564   | 3      | 3      | 3       | 2      | 2     |
| ECs2566   | 3      | 3      | 3       | 2      | 2     |
| ECs2568   | 3      | 3      | 3       | 2      | 2     |
| ECs2569   | 2      | 2      | 2       | 2      | 2     |
| ECs2570   | 2      | 2      | 2       | 2      | 2     |
| ECs2571   | 2      | 2      | 2       | 2      | 2     |
| ECs2572   | 3      | 3      | 3       | 2      | 2     |
| ECs2573   | 2      | 2      | 2       | 2      | 2     |
| ECs2574   | 2      | 2      | 2       | 2      | 2     |
| ECs2575   | 2      | 2      | 2       | 2      | 2     |
| ECs2576   | 3      | 3      | 3       | 22     | 22    |
| ECs2577   | 2      | 2      | 2       | 2      | 2     |
| ECs2579   | 2      | 2      | 2       | 2      | 2     |
| ECs2580   | 2      | 2      | 2       | 2      | 2     |
| ECs2581   | 2      | 2      | 2       | 2      | 2     |

| Locus tag | 258/98 | 493/89 | 3072/96 | EDL933 | Sakai |
|-----------|--------|--------|---------|--------|-------|
| ECs2582   | 3      | 3      | 3       | 2      | 2     |
| ECs2583   | 3      | 3      | 3       | 2      | 2     |
| ECs2584   | 3      | 3      | 3       | 2      | 2     |
| ECs2585   | 2      | 2      | 2       | 2      | 2     |
| ECs2586   | 3      | 3      | 3       | 2      | 2     |
| ECs2608   | 2      | 2      | 2       | 43     | 2     |
| ECs2609   | 2      | 2      | 2       | 2      | 2     |
| ECs2610   | 3      | 3      | 3       | 3      | 3     |
| ECs5464   | 2      | 2      | 2       | 2      | 2     |
| ECs2612   | 2      | 2      | 2       | 2      | 2     |
| ECs2613   | 2      | 2      | 2       | 2      | 2     |
| ECs2614   | 2      | 2      | 2       | 2      | 2     |
| ECs2615   | 2      | 2      | 2       | 2      | 2     |
| ECs2616   | 2      | 2      | 2       | 2      | 2     |
| ECs2650   | 3      | 3      | 3       | 2      | 2     |
| ECs2706   | 2      | 2      | 2       | 2      | 2     |
| ECs2707   | 2      | 2      | 2       | 2      | 2     |
| ECs2708   | 2      | 2      | 2       | 2      | 2     |
| ECs2709   | 2      | 2      | 2       | 2      | 2     |
| ECs2774   | 2      | 2      | 2       | 2      | 2     |
| ECs2779   | 3      | 3      | 3       | 2      | 2     |
| ECs2783   | 2      | 2      | 2       | 2      | 2     |
| ECs2784   | 2      | 2      | 2       | 2      | 2     |
| ECs2786   | 2      | 2      | 2       | 2      | 2     |
| ECs2787   | 2      | 2      | 2       | 2      | 2     |
| ECs2788   | 2      | 2      | 2       | 2      | 2     |
| ECs2811   | 2      | 2      | 2       | 2      | 2     |
| ECs2812   | 2      | 2      | 2       | 2      | 2     |
| ECs2816   | 2      | 2      | 2       | 2      | 2     |
| ECs2817   | 2      | 2      | 2       | 2      | 2     |
| ECs2818   | 2      | 2      | 2       | 2      | 2     |
| ECs2820   | 2      | 2      | 2       | 2      | 2     |
| ECs2821   | 2      | 2      | 2       | 2      | 2     |
| ECs2871   | 3      | 3      | 3       | 29     | 29    |
| ECs2872   | 2      | 2      | 2       | 2      | 2     |
| ECs2873   | 2      | 2      | 2       | 2      | 2     |
| ECs2877   | 2      | 2      | 2       | 2      | 2     |
| ECs2880   | 3      | 3      | 3       | 2      | 2     |
| ECs2881   | 2      | 2      | 2       | 2      | 2     |
| ECs2882   | 3      | 3      | 3       | 2      | 2     |
| ECs2883   | 3      | 3      | 3       | 31     | 31    |
| ECs2884   | 3      | 3      | 3       | 2      | 2     |
| ECs2886   | 3      | 3      | 3       | 2      | 2     |
| ECs2887   | 2      | 2      | 2       | 2      | 2     |
| ECs2902   | 2      | 2      | 2       | 2      | 2     |
| ECs2903   | 2      | 2      | 2       | 2      | 2     |
| ECs2905   | 3      | 3      | 3       | 2      | 2     |
| ECs2906   | 2      | 2      | 2       | 2      | 2     |
| ECs2907   | 2      | 2      | 2       | 2      | 2     |
| ECs2919   | 2      | 2      | 2       | 2      | 2     |
| ECs2920   | 2      | 2      | 2       | 2      | 2     |
| ECs2935   | 2      | 2      | 2       | 2      | 2     |
| ECs2936   | 2      | 2      | 2       | 2      | 2     |

| Locus tag | 258/98 | 493/89 | 3072/96 | EDL933 | Sakai |
|-----------|--------|--------|---------|--------|-------|
| ECs2937   | 5      | 5      | 3       | 2      | 2     |
| ECs3014   | 2      | 2      | 2       | 2      | 2     |
| ECs3015   | 3      | 3      | 3       | 2      | 2     |
| ECs3017   | 3      | 3      | 3       | 24     | 24    |
| ECs3018   | 3      | 3      | 3       | 2      | 2     |
| ECs3019   | 2      | 2      | 2       | 2      | 2     |
| ECs3020   | 2      | 2      | 2       | 2      | 2     |
| ECs3021   | 2      | 2      | 2       | 2      | 2     |
| ECs3022   | 3      | 3      | 3       | 3      | 14    |
| ECs3023   | 2      | 2      | 2       | 2      | 2     |
| ECs3024   | 3      | 3      | 3       | 2      | 2     |
| ECs3025   | 2      | 2      | 2       | 1      | 1     |
| ECs3026   | 2      | 2      | 2       | 27     | 2     |
| ECs3033   | 2      | 2      | 2       | 2      | 2     |
| ECs3034   | 2      | 2      | 2       | 2      | 2     |
| ECs3035   | 2      | 2      | 2       | 2      | 2     |
| ECs3036   | 2      | 2      | 2       | 2      | 2     |
| ECs3037   | 1      | 1      | 1       | 1      | 1     |
| ECs3040   | 2      | 2      | 2       | 2      | 2     |
| ECs3042   | 2      | 2      | 2       | 2      | 2     |
| ECs3043   | 2      | 2      | 2       | 2      | 2     |
| ECs3044   | 2      | 2      | 2       | 20     | 20    |
| ECs3045   | 2      | 2      | 2       | 2      | 2     |
| ECs3046   | 2      | 2      | 2       | 2      | 2     |
| ECs3048   | 2      | 2      | 2       | 2      | 2     |
| ECs3049   | 3      | 3      | 3       | 2      | 2     |
| ECs3050   | 2      | 2      | 2       | 2      | 2     |
| ECs3051   | 1      | 1      | 1       | 1      | 1     |
| ECs3055   | 2      | 2      | 2       | 2      | 2     |
| ECs3059   | 3      | 3      | 3       | 2      | 2     |
| ECs3067   | 2      | 2      | 2       | 2      | 2     |
| ECs3068   | 2      | 2      | 2       | 2      | 2     |
| ECs3069   | 3      | 3      | 3       | 27     | 27    |
| ECs3071   | 2      | 2      | 2       | 2      | 2     |
| ECs3072   | 2      | 2      | 2       | 2      | 2     |
| ECs3073   | 1      | 1      | 1       | 2      | 2     |
| ECs3074   | 2      | 2      | 2       | 2      | 2     |
| ECs3075   | 2      | 2      | 2       | 2      | 2     |
| ECs3076   | 3      | 3      | 3       | 3      | 3     |
| ECs3077   | 3      | 3      | 3       | 2      | 2     |
| ECs3078   | 2      | 2      | 2       | 2      | 2     |
| ECs3079   | 1      | 1      | 1       | 1      | 1     |
| ECs3080   | 2      | 2      | 2       | 2      | 2     |
| ECs3082   | 2      | 2      | 2       | 2      | 2     |
| ECs3083   | 2      | 2      | 2       | 2      | 2     |
| ECs3084   | 2      | 2      | 2       | 2      | 2     |
| ECs3085   | 187    | 3      | 3       | 2      | 2     |
| ECs3086   | 3      | 3      | 3       | 2      | 2     |
| ECs3087   | 2      | 2      | 2       | 2      | 2     |
| ECs3088   | 2      | 2      | 2       | 2      | 2     |
| ECs3089   | 2      | 2      | 2       | 2      | 2     |
| ECs3090   | 2      | 2      | 2       | 2      | 2     |
| ECs3091   | 2      | 2      | 2       | 2      | 2     |

| Locus tag | 258/98 | 493/89 | 3072/96 | EDL933 | Sakai |
|-----------|--------|--------|---------|--------|-------|
| ECs3092   | 2      | 2      | 2       | 2      | 2     |
| ECs3093   | 3      | 3      | 3       | 2      | 2     |
| ECs3097   | 2      | 2      | 2       | 2      | 2     |
| ECs3098   | 2      | 2      | 2       | 2      | 2     |
| ECs3099   | 2      | 2      | 2       | 2      | 2     |
| ECs3100   | 2      | 2      | 2       | 29     | 29    |
| ECs3101   | 2      | 2      | 2       | 2      | 2     |
| ECs3102   | 2      | 2      | 2       | 2      | 2     |
| ECs3103   | 120    | 2      | 2       | 41     | 2     |
| ECs3108   | 3      | 3      | 3       | 2      | 2     |
| ECs3109   | 3      | 3      | 3       | 2      | 2     |
| ECs3113   | 2      | 2      | 2       | 2      | 2     |
| ECs3114   | 2      | 2      | 2       | 23     | 23    |
| ECs3115   | 2      | 2      | 2       | 2      | 2     |
| ECs3117   | 3      | 3      | 3       | 3      | 21    |
| ECs3118   | 2      | 2      | 2       | 2      | 2     |
| ECs3119   | 3      | 3      | 3       | 2      | 2     |
| ECs3120   | 2      | 2      | 2       | 2      | 2     |
| ECs3124   | 3      | 3      | 3       | 2      | 2     |
| ECs3125   | 2      | 2      | 2       | 2      | 2     |
| ECs3126   | 2      | 2      | 2       | 2      | 2     |
| ECs3128   | 2      | 2      | 2       | 2      | 2     |
| ECs3137   | 2      | 2      | 2       | 2      | 2     |
| ECs3138   | 2      | 2      | 2       | 2      | 2     |
| ECs3139   | 2      | 2      | 2       | 2      | 2     |
| ECs3140   | 2      | 2      | 2       | 2      | 2     |
| ECs3142   | 3      | 3      | 3       | 2      | 2     |
| ECs3143   | 3      | 3      | 3       | 2      | 2     |
| ECs3144   | 3      | 3      | 3       | 3      | 3     |
| ECs3145   | 2      | 2      | 2       | 2      | 2     |
| ECs5486   | 3      | 3      | 3       | 2      | 2     |
| ECs3146   | 2      | 2      | 2       | 2      | 2     |
| ECs3148   | 3      | 3      | 3       | 2      | 21    |
| ECs3149   | 2      | 2      | 2       | 2      | 2     |
| ECs3150   | 2      | 2      | 2       | 2      | 2     |
| ECs3151   | 2      | 2      | 2       | 2      | 2     |
| ECs3152   | 2      | 2      | 2       | 2      | 2     |
| ECs3153   | 2      | 2      | 2       | 2      | 2     |
| ECs3154   | 2      | 2      | 2       | 2      | 2     |
| ECs3156   | 3      | 3      | 3       | 2      | 2     |
| ECs3159   | 2      | 2      | 2       | 2      | 2     |
| ECs3160   | 2      | 2      | 2       | 2      | 2     |
| ECs3161   | 2      | 3      | 2       | 2      | 2     |
| ECs3162   | 2      | 2      | 2       | 2      | 2     |
| ECs3163   | 2      | 2      | 2       | 2      | 2     |
| ECs3164   | 2      | 2      | 2       | 2      | 2     |
| ECs3165   | 2      | 2      | 2       | 2      | 2     |
| ECs3166   | 2      | 2      | 2       | 25     | 2     |
| ECs3167   | 206    | 3      | 3       | 2      | 2     |
| ECs3168   | 2      | 2      | 2       | 2      | 2     |
| ECs3169   | 2      | 2      | 2       | 2      | 2     |
| ECs3170   | 3      | 3      | 3       | 2      | 2     |
| ECs3171   | 2      | 2      | 2       | 2      | 2     |

| Locus tag | 258/98 | 493/89 | 3072/96 | EDL933 | Sakai |
|-----------|--------|--------|---------|--------|-------|
| ECs3172   | 2      | 2      | 2       | 2      | 2     |
| ECs3173   | 2      | 2      | 2       | 2      | 2     |
| ECs3174   | 3      | 3      | 3       | 2      | 2     |
| ECs3175   | 3      | 3      | 3       | 2      | 2     |
| ECs3176   | 3      | 3      | 3       | 2      | 2     |
| ECs3177   | 3      | 3      | 3       | 2      | 2     |
| ECs3178   | 2      | 2      | 2       | 2      | 2     |
| ECs3180   | 2      | 2      | 2       | 2      | 2     |
| ECs3181   | 2      | 2      | 2       | 2      | 2     |
| ECs3182   | 2      | 2      | 2       | 2      | 2     |
| ECs3183   | 3      | 3      | 3       | 2      | 2     |
| ECs3184   | 2      | 2      | 2       | 2      | 2     |
| ECs3185   | 3      | 3      | 3       | 2      | 2     |
| ECs3186   | 2      | 2      | 2       | 2      | 2     |
| ECs3187   | 2      | 2      | 2       | 2      | 2     |
| ECs3190   | 2      | 2      | 2       | 2      | 2     |
| ECs3191   | 2      | 2      | 2       | 2      | 2     |
| ECs3192   | 2      | 2      | 2       | 2      | 2     |
| ECs3193   | 2      | 2      | 2       | 2      | 2     |
| ECs3194   | 2      | 2      | 2       | 2      | 2     |
| ECs3195   | 3      | 3      | 3       | 2      | 2     |
| ECs3196   | 2      | 2      | 2       | 2      | 2     |
| ECs3197   | 2      | 2      | 2       | 2      | 2     |
| ECs3199   | 3      | 3      | 3       | 2      | 2     |
| ECs3200   | 2      | 2      | 2       | 2      | 2     |
| ECs3202   | 3      | 3      | 3       | 3      | 3     |
| ECs3203   | 3      | 3      | 3       | 2      | 2     |
| ECs3204   | 2      | 2      | 2       | 2      | 2     |
| ECs3207   | 2      | 2      | 2       | 2      | 2     |
| ECs3208   | 3      | 3      | 3       | 2      | 2     |
| ECs3209   | 3      | 20     | 3       | 2      | 2     |
| ECs3210   | 2      | 2      | 2       | 2      | 2     |
| ECs3211   | 2      | 2      | 2       | 2      | 2     |
| ECs3212   | 3      | 3      | 3       | 2      | 2     |
| ECs3213   | 2      | 2      | 2       | 2      | 2     |
| ECs3215   | 2      | 2      | 2       | 2      | 2     |
| ECs3223   | 2      | 2      | 2       | 2      | 2     |
| ECs3224   | 2      | 2      | 2       | 27     | 27    |
| ECs3225   | 3      | 3      | 3       | 2      | 2     |
| ECs3226   | 2      | 2      | 2       | 2      | 2     |
| ECs3229   | 2      | 2      | 2       | 2      | 2     |
| ECs3230   | 2      | 2      | 2       | 2      | 2     |
| ECs3254   | 2      | 2      | 2       | 2      | 2     |
| ECs3255   | 88     | 2      | 2       | 2      | 2     |
| ECs3256   | 2      | 2      | 2       | 2      | 2     |
| ECs3257   | 2      | 34     | 2       | 2      | 2     |
| ECs3258   | 2      | 2      | 2       | 2      | 2     |
| ECs3259   | 2      | 2      | 2       | 2      | 2     |
| ECs3260   | 3      | 3      | 3       | 2      | 2     |
| ECs3261   | 2      | 2      | 2       | 2      | 2     |
| ECs3264   | 2      | 2      | 2       | 2      | 2     |
| ECs3265   | 2      | 2      | 2       | 2      | 2     |
| ECs3266   | 2      | 2      | 2       | 2      | 2     |

| Locus tag | 258/98 | 493/89 | 3072/96 | EDL933 | Sakai |
|-----------|--------|--------|---------|--------|-------|
| ECs3267   | 2      | 2      | 2       | 2      | 2     |
| ECs3268   | 2      | 2      | 2       | 2      | 2     |
| ECs3274   | 2      | 2      | 2       | 2      | 2     |
| ECs3278   | 2      | 2      | 2       | 2      | 2     |
| ECs3282   | 2      | 2      | 2       | 2      | 2     |
| ECs5495   | 1      | 1      | 1       | 1      | 1     |
| ECs3283   | 2      | 2      | 2       | 2      | 2     |
| ECs3284   | 3      | 3      | 3       | 2      | 2     |
| ECs3285   | 2      | 2      | 2       | 2      | 2     |
| ECs3286   | 2      | 2      | 2       | 2      | 2     |
| ECs3287   | 2      | 2      | 2       | 2      | 2     |
| ECs3288   | 3      | 3      | 3       | 2      | 2     |
| ECs3289   | 2      | 2      | 2       | 12     | 12    |
| ECs3290   | 2      | 2      | 2       | 2      | 2     |
| ECs3292   | 3      | 3      | 3       | 31     | 2     |
| ECs3293   | 132    | 2      | 2       | 2      | 2     |
| ECs3295   | 2      | 2      | 2       | 2      | 2     |
| ECs3296   | 3      | 3      | 3       | 3      | 3     |
| ECs3297   | 2      | 2      | 2       | 2      | 2     |
| ECs3299   | 3      | 3      | 3       | 2      | 2     |
| ECs3300   | 2      | 2      | 2       | 2      | 2     |
| ECs3302   | 2      | 2      | 2       | 2      | 2     |
| ECs3303   | 3      | 3      | 3       | 2      | 2     |
| ECs3304   | 1      | 1      | 1       | 1      | 1     |
| ECs3306   | 2      | 2      | 2       | 2      | 2     |
| ECs3307   | 3      | 3      | 3       | 2      | 2     |
| ECs3308   | 2      | 2      | 2       | 2      | 2     |
| ECs3309   | 2      | 2      | 2       | 2      | 2     |
| ECs3310   | 2      | 2      | 2       | 2      | 2     |
| ECs3312   | 3      | 3      | 3       | 3      | 3     |
| ECs3315   | 2      | 2      | 2       | 2      | 2     |
| ECs3317   | 3      | 3      | 3       | 2      | 2     |
| ECs3318   | 2      | 2      | 2       | 2      | 2     |
| ECs3319   | 2      | 2      | 2       | 2      | 2     |
| ECs3320   | 2      | 2      | 2       | 2      | 2     |
| ECs3322   | 3      | 3      | 3       | 2      | 2     |
| ECs3324   | 2      | 2      | 2       | 2      | 2     |
| ECs3325   | 3      | 3      | 3       | 24     | 24    |
| ECs3326   | 3      | 3      | 3       | 2      | 2     |
| ECs3327   | 3      | 3      | 3       | 2      | 2     |
| ECs3328   | 2      | 2      | 2       | 2      | 2     |
| ECs3329   | 3      | 3      | 3       | 2      | 2     |
| ECs3330   | 2      | 2      | 2       | 2      | 2     |
| ECs3331   | 3      | 3      | 3       | 2      | 2     |
| ECs3332   | 2      | 2      | 2       | 2      | 26    |
| ECs3333   | 3      | 3      | 3       | 2      | 2     |
| ECs3334   | 2      | 2      | 2       | 2      | 2     |
| ECs5496   | 1      | 1      | 1       | 1      | 1     |
| ECs3335   | 2      | 2      | 2       | 2      | 2     |
| ECs3336   | 3      | 3      | 3       | 2      | 27    |
| ECs3337   | 2      | 2      | 2       | 2      | 2     |
| ECs3338   | 2      | 2      | 2       | 2      | 2     |
| ECs3339   | 3      | 3      | 3       | 2      | 2     |

| Locus tag | 258/98 | 493/89 | 3072/96 | EDL933 | Sakai |
|-----------|--------|--------|---------|--------|-------|
| ECs3340   | 2      | 2      | 2       | 2      | 2     |
| ECs3341   | 3      | 3      | 3       | 2      | 2     |
| ECs3342   | 2      | 2      | 2       | 2      | 2     |
| ECs3355   | 2      | 2      | 2       | 2      | 2     |
| ECs3356   | 3      | 3      | 3       | 2      | 2     |
| ECs3357   | 2      | 2      | 2       | 2      | 2     |
| ECs3358   | 2      | 2      | 2       | 2      | 2     |
| ECs3359   | 2      | 2      | 2       | 2      | 2     |
| ECs3360   | 2      | 2      | 2       | 2      | 2     |
| ECs3361   | 2      | 2      | 2       | 2      | 2     |
| ECs3362   | 3      | 3      | 3       | 2      | 2     |
| ECs3363   | 2      | 2      | 2       | 2      | 2     |
| ECs3364   | 2      | 2      | 2       | 2      | 2     |
| ECs5497   | 2      | 2      | 2       | 2      | 2     |
| ECs3366   | 1      | 1      | 1       | 1      | 1     |
| ECs3367   | 2      | 2      | 2       | 2      | 2     |
| ECs3369   | 2      | 2      | 2       | 2      | 2     |
| ECs3370   | 2      | 2      | 2       | 2      | 2     |
| ECs3373   | 2      | 2      | 2       | 2      | 2     |
| ECs3374   | 3      | 3      | 3       | 2      | 2     |
| ECs3375   | 1      | 1      | 1       | 2      | 2     |
| ECs3376   | 2      | 2      | 2       | 2      | 2     |
| ECs3377   | 2      | 2      | 2       | 2      | 2     |
| ECs3378   | 2      | 2      | 2       | 2      | 2     |
| ECs3379   | 3      | 3      | 3       | 2      | 2     |
| ECs3380   | 2      | 2      | 2       | 2      | 2     |
| ECs3386   | 3      | 3      | 3       | 2      | 2     |
| ECs3387   | 2      | 2      | 2       | 2      | 2     |
| ECs3388   | 2      | 2      | 2       | 2      | 2     |
| ECs3389   | 2      | 2      | 2       | 2      | 2     |
| ECs3390   | 1      | 1      | 1       | 1      | 1     |
| ECs3391   | 2      | 2      | 2       | 2      | 2     |
| ECs3392   | 2      | 2      | 2       | 2      | 2     |
| ECs3393   | 3      | 3      | 3       | 3      | 3     |
| ECs3394   | 2      | 2      | 2       | 2      | 2     |
| ECs3395   | 2      | 2      | 2       | 2      | 2     |
| ECs3396   | 2      | 2      | 2       | 2      | 2     |
| ECs3397   | 2      | 2      | 2       | 2      | 2     |
| ECs3398   | 1      | 1      | 1       | 1      | 1     |
| ECs3399   | 2      | 2      | 2       | 2      | 2     |
| ECs3400   | 3      | 3      | 3       | 2      | 2     |
| ECs3401   | 3      | 3      | 3       | 2      | 2     |
| ECs3410   | 2      | 2      | 2       | 2      | 2     |
| ECs3411   | 3      | 3      | 3       | 2      | 2     |
| ECs3412   | 3      | 3      | 3       | 2      | 2     |
| ECs3413   | 2      | 2      | 2       | 2      | 2     |
| ECs3415   | 3      | 3      | 3       | 2      | 2     |
| ECs3416   | 2      | 2      | 2       | 26     | 26    |
| ECs3417   | 2      | 2      | 2       | 2      | 2     |
| ECs3418   | 2      | 2      | 2       | 2      | 2     |
| ECs3419   | 2      | 2      | 2       | 2      | 2     |
| ECs3420   | 2      | 2      | 2       | 2      | 2     |
| ECs3422   | 2      | 2      | 2       | 2      | 2     |

| Locus tag | 258/98 | 493/89 | 3072/96 | EDL933 | Sakai |
|-----------|--------|--------|---------|--------|-------|
| ECs3423   | 3      | 4      | 3       | 33     | 33    |
| ECs3425   | 2      | 2      | 2       | 2      | 2     |
| ECs3426   | 2      | 2      | 2       | 2      | 2     |
| ECs3427   | 2      | 2      | 2       | 2      | 2     |
| ECs3429   | 2      | 2      | 2       | 2      | 2     |
| ECs3430   | 2      | 2      | 2       | 2      | 2     |
| ECs3431   | 2      | 2      | 2       | 2      | 2     |
| ECs3432   | 2      | 2      | 2       | 2      | 2     |
| ECs3433   | 2      | 2      | 2       | 2      | 2     |
| ECs3434   | 2      | 2      | 2       | 2      | 2     |
| ECs3435   | 3      | 3      | 3       | 3      | 3     |
| ECs3436   | 2      | 2      | 2       | 2      | 2     |
| ECs3437   | 2      | 2      | 2       | 2      | 2     |
| ECs3438   | 1      | 1      | 1       | 1      | 1     |
| ECs3439   | 2      | 2      | 2       | 2      | 2     |
| ECs3440   | 2      | 2      | 2       | 2      | 2     |
| ECs3442   | 3      | 3      | 3       | 2      | 2     |
| ECs3443   | 2      | 2      | 2       | 2      | 2     |
| ECs3444   | 2      | 2      | 2       | 2      | 2     |
| ECs3445   | 2      | 2      | 2       | 2      | 2     |
| ECs3447   | 2      | 2      | 2       | 2      | 2     |
| ECs3448   | 2      | 2      | 2       | 2      | 2     |
| ECs3449   | 2      | 2      | 2       | 2      | 2     |
| ECs3452   | 2      | 2      | 2       | 2      | 2     |
| ECs3453   | 2      | 2      | 2       | 2      | 2     |
| ECs3455   | 2      | 2      | 2       | 2      | 2     |
| ECs3456   | 2      | 2      | 2       | 2      | 2     |
| ECs3457   | 2      | 2      | 2       | 2      | 2     |
| ECs3458   | 2      | 2      | 2       | 2      | 2     |
| ECs3459   | 2      | 2      | 2       | 2      | 2     |
| ECs3460   | 2      | 2      | 2       | 2      | 2     |
| ECs3462   | 2      | 2      | 2       | 2      | 2     |
| ECs3463   | 2      | 2      | 2       | 2      | 2     |
| ECs3464   | 3      | 3      | 3       | 2      | 2     |
| ECs3467   | 3      | 3      | 3       | 2      | 2     |
| ECs3468   | 3      | 3      | 3       | 2      | 2     |
| ECs3469   | 1      | 1      | 1       | 1      | 1     |
| ECs3470   | 2      | 2      | 2       | 2      | 2     |
| ECs3471   | 2      | 2      | 2       | 2      | 2     |
| ECs3472   | 1      | 1      | 1       | 1      | 1     |
| ECs3473   | 2      | 2      | 2       | 21     | 21    |
| ECs3474   | 2      | 2      | 2       | 2      | 2     |
| ECs3475   | 2      | 2      | 2       | 23     | 23    |
| ECs3476   | 3      | 3      | 3       | 3      | 3     |
| ECs3477   | 3      | 3      | 3       | 2      | 2     |
| ECs3478   | 3      | 3      | 3       | 2      | 2     |
| ECs3479   | 2      | 2      | 2       | 2      | 2     |
| ECs3481   | 2      | 2      | 2       | 2      | 2     |
| ECs3482   | 2      | 2      | 2       | 2      | 2     |
| ECs3522   | 2      | 2      | 2       | 2      | 2     |
| ECs3523   | 2      | 2      | 2       | 2      | 2     |
| ECs3524   | 2      | 2      | 2       | 2      | 2     |
| ECs3525   | 2      | 2      | 2       | 2      | 2     |



| Locus tag | 258/98 | 493/89 | 3072/96 | EDL933 | Sakai |
|-----------|--------|--------|---------|--------|-------|
| ECs3526   | 2      | 2      | 2       | 2      | 2     |
| ECs3528   | 2      | 2      | 2       | 2      | 2     |
| ECs3530   | 2      | 2      | 2       | 2      | 2     |
| ECs3532   | 1      | 1      | 1       | 1      | 1     |
| ECs3533   | 2      | 2      | 2       | 2      | 2     |
| ECs3536   | 1      | 1      | 1       | 1      | 1     |
| ECs3538   | 2      | 2      | 2       | 2      | 2     |
| ECs3539   | 3      | 3      | 3       | 2      | 2     |
| ECs3542   | 2      | 2      | 2       | 2      | 2     |
| ECs3543   | 1      | 1      | 1       | 1      | 1     |
| ECs3544   | 3      | 3      | 3       | 2      | 2     |
| ECs3546   | 2      | 2      | 2       | 2      | 2     |
| ECs3547   | 2      | 2      | 2       | 2      | 2     |
| ECs3548   | 2      | 2      | 2       | 2      | 2     |
| ECs3549   | 2      | 2      | 2       | 2      | 2     |
| ECs3550   | 3      | 3      | 3       | 39     | 2     |
| ECs3552   | 3      | 3      | 3       | 3      | 3     |
| ECs3553   | 1      | 1      | 1       | 1      | 1     |
| ECs3554   | 3      | 3      | 3       | 2      | 2     |
| ECs3555   | 2      | 2      | 2       | 2      | 2     |
| ECs3556   | 2      | 2      | 2       | 2      | 2     |
| ECs3557   | 2      | 2      | 2       | 2      | 2     |
| ECs3558   | 2      | 2      | 2       | 2      | 2     |
| ECs3564   | 3      | 3      | 3       | 3      | 3     |
| ECs3565   | 2      | 2      | 2       | 2      | 2     |
| ECs3567   | 3      | 3      | 3       | 2      | 2     |
| ECs3573   | 2      | 2      | 2       | 2      | 2     |
| ECs3575   | 2      | 2      | 2       | 2      | 2     |
| ECs3576   | 3      | 3      | 3       | 2      | 2     |
| ECs3577   | 3      | 3      | 3       | 2      | 2     |
| ECs3578   | 2      | 2      | 2       | 21     | 21    |
| ECs3579   | 2      | 2      | 2       | 2      | 2     |
| ECs3580   | 2      | 2      | 2       | 2      | 2     |
| ECs3581   | 2      | 2      | 2       | 2      | 2     |
| ECs3582   | 2      | 2      | 2       | 2      | 2     |
| ECs3583   | 3      | 3      | 3       | 2      | 2     |
| ECs3585   | 2      | 2      | 2       | 19     | 19    |
| ECs3586   | 3      | 3      | 3       | 2      | 2     |
| ECs3587   | 2      | 2      | 2       | 2      | 2     |
| ECs3588   | 2      | 2      | 2       | 2      | 2     |
| ECs3595   | 75     | 84     | 1       | 110    | 18    |
| ECs3599   | 2      | 2      | 2       | 2      | 2     |
| ECs3600   | 2      | 2      | 2       | 2      | 2     |
| ECs3601   | 2      | 2      | 2       | 2      | 2     |
| ECs3602   | 1      | 1      | 1       | 1      | 1     |
| ECs3604   | 3      | 3      | 3       | 3      | 3     |
| ECs3605   | 3      | 3      | 3       | 2      | 2     |
| ECs3606   | 3      | 3      | 3       | 2      | 2     |
| ECs3617   | 2      | 2      | 2       | 2      | 2     |
| ECs3618   | 3      | 3      | 3       | 2      | 2     |
| ECs3619   | 2      | 2      | 2       | 2      | 2     |
| ECs3620   | 2      | 2      | 2       | 2      | 2     |
| ECs3621   | 2      | 2      | 2       | 2      | 2     |

| Locus tag | 258/98 | 493/89 | 3072/96 | EDL933 | Sakai |
|-----------|--------|--------|---------|--------|-------|
| ECs3623   | 2      | 2      | 2       | 2      | 2     |
| ECs3626   | 2      | 2      | 2       | 2      | 2     |
| ECs3629   | 2      | 2      | 2       | 2      | 2     |
| ECs3630   | 2      | 2      | 2       | 2      | 2     |
| ECs3632   | 2      | 2      | 3       | 21     | 21    |
| ECs3633   | 2      | 2      | 2       | 2      | 2     |
| ECs3639   | 2      | 2      | 2       | 2      | 2     |
| ECs3640   | 118    | 2      | 2       | 2      | 2     |
| ECs3641   | 2      | 2      | 2       | 2      | 2     |
| ECs3645   | 3      | 3      | 3       | 2      | 24    |
| ECs3647   | 2      | 2      | 2       | 2      | 2     |
| ECs3648   | 2      | 2      | 2       | 2      | 2     |
| ECs3649   | 1      | 1      | 1       | 1      | 1     |
| ECs3650   | 2      | 2      | 2       | 2      | 2     |
| ECs3651   | 3      | 3      | 3       | 2      | 2     |
| ECs3652   | 2      | 2      | 2       | 2      | 2     |
| ECs3653   | 3      | 3      | 3       | 2      | 2     |
| ECs3654   | 3      | 3      | 3       | 3      | 3     |
| ECs3655   | 2      | 2      | 2       | 2      | 2     |
| ECs3656   | 2      | 2      | 2       | 2      | 2     |
| ECs3657   | 2      | 2      | 2       | 2      | 2     |
| ECs3658   | 2      | 2      | 2       | 2      | 2     |
| ECs3659   | 2      | 2      | 2       | 2      | 2     |
| ECs3662   | 2      | 2      | 2       | 2      | 2     |
| ECs3663   | 3      | 3      | 3       | 21     | 21    |
| ECs3664   | 2      | 2      | 2       | 2      | 2     |
| ECs3665   | 2      | 2      | 2       | 2      | 2     |
| ECs3666   | 2      | 2      | 2       | 2      | 2     |
| ECs3668   | 2      | 2      | 2       | 2      | 2     |
| ECs3669   | 2      | 2      | 2       | 2      | 2     |
| ECs3670   | 2      | 2      | 2       | 2      | 2     |
| ECs3671   | 3      | 3      | 3       | 3      | 3     |
| ECs3672   | 3      | 3      | 3       | 2      | 2     |
| ECs3673   | 2      | 2      | 2       | 2      | 2     |
| ECs3675   | 3      | 3      | 3       | 2      | 2     |
| ECs3676   | 2      | 2      | 2       | 2      | 2     |
| ECs3677   | 3      | 3      | 3       | 2      | 2     |
| ECs3679   | 2      | 2      | 2       | 28     | 28    |
| ECs3681   | 2      | 2      | 2       | 2      | 2     |
| ECs3682   | 3      | 3      | 3       | 3      | 3     |
| ECs3684   | 3      | 3      | 3       | 2      | 2     |
| ECs3685   | 2      | 2      | 2       | 2      | 2     |
| ECs3686   | 2      | 2      | 2       | 2      | 2     |
| ECs3687   | 1      | 1      | 1       | 1      | 1     |
| ECs3688   | 2      | 2      | 2       | 2      | 2     |
| ECs3689   | 2      | 2      | 2       | 2      | 2     |
| ECs3690   | 2      | 2      | 2       | 2      | 2     |
| ECs3691   | 3      | 3      | 3       | 2      | 2     |
| ECs3693   | 2      | 2      | 2       | 2      | 2     |
| ECs3694   | 2      | 2      | 2       | 2      | 2     |
| ECs3695   | 3      | 3      | 3       | 2      | 2     |
| ECs3696   | 2      | 2      | 2       | 2      | 2     |
| ECs3698   | 3      | 3      | 3       | 3      | 3     |

| Locus tag | 258/98 | 493/89 | 3072/96 | EDL933 | Sakai |
|-----------|--------|--------|---------|--------|-------|
| ECs3700   | 2      | 2      | 2       | 2      | 2     |
| ECs3701   | 2      | 2      | 2       | 2      | 2     |
| ECs3702   | 2      | 2      | 2       | 2      | 2     |
| ECs3738   | 2      | 2      | 2       | 2      | 2     |
| ECs3739   | 3      | 3      | 3       | 22     | 22    |
| ECs3740   | 3      | 3      | 3       | 2      | 2     |
| ECs3741   | 3      | 3      | 3       | 2      | 2     |
| ECs3742   | 3      | 3      | 3       | 2      | 2     |
| ECs3743   | 2      | 2      | 2       | 2      | 16    |
| ECs3744   | 2      | 2      | 2       | 2      | 2     |
| ECs3745   | 2      | 2      | 2       | 2      | 2     |
| ECs3746   | 3      | 3      | 3       | 2      | 2     |
| ECs3747   | 2      | 2      | 2       | 2      | 2     |
| ECs3749   | 2      | 2      | 2       | 2      | 14    |
| ECs3750   | 2      | 2      | 2       | 2      | 2     |
| ECs3752   | 2      | 2      | 2       | 2      | 2     |
| ECs3753   | 2      | 2      | 2       | 2      | 2     |
| ECs3754   | 41     | 41     | 41      | 2      | 2     |
| ECs3755   | 2      | 2      | 2       | 2      | 2     |
| ECs3756   | 2      | 2      | 2       | 2      | 2     |
| ECs3757   | 2      | 2      | 2       | 2      | 2     |
| ECs3758   | 2      | 2      | 2       | 2      | 2     |
| ECs3759   | 2      | 2      | 2       | 2      | 2     |
| ECs3760   | 3      | 3      | 3       | 2      | 2     |
| ECs3761   | 2      | 2      | 2       | 2      | 2     |
| ECs3762   | 2      | 2      | 2       | 2      | 2     |
| ECs3764   | 3      | 3      | 3       | 2      | 2     |
| ECs3765   | 2      | 2      | 2       | 2      | 2     |
| ECs3766   | 3      | 3      | 3       | 15     | 15    |
| ECs3767   | 2      | 2      | 2       | 2      | 2     |
| ECs3768   | 2      | 2      | 2       | 2      | 2     |
| ECs3770   | 2      | 2      | 2       | 2      | 2     |
| ECs3771   | 2      | 2      | 2       | 2      | 2     |
| ECs3772   | 2      | 2      | 2       | 2      | 2     |
| ECs3773   | 2      | 2      | 2       | 2      | 2     |
| ECs3774   | 3      | 3      | 3       | 2      | 2     |
| ECs3775   | 2      | 2      | 2       | 2      | 2     |
| ECs3776   | 3      | 3      | 3       | 2      | 2     |
| ECs3777   | 3      | 3      | 3       | 19     | 19    |
| ECs3778   | 3      | 3      | 3       | 4      | 4     |
| ECs3779   | 2      | 2      | 2       | 2      | 2     |
| ECs3780   | 2      | 2      | 2       | 2      | 2     |
| ECs3781   | 2      | 2      | 2       | 2      | 2     |
| ECs3782   | 2      | 2      | 2       | 2      | 2     |
| ECs3784   | 2      | 2      | 2       | 2      | 2     |
| ECs3785   | 2      | 2      | 2       | 2      | 2     |
| ECs3786   | 2      | 2      | 2       | 2      | 2     |
| ECs3793   | 3      | 3      | 3       | 2      | 2     |
| ECs3794   | 3      | 3      | 3       | 2      | 2     |
| ECs3795   | 2      | 2      | 2       | 2      | 2     |
| ECs3796   | 2      | 2      | 2       | 2      | 2     |
| ECs3797   | 3      | 3      | 3       | 2      | 2     |
| ECs3798   | 2      | 2      | 2       | 2      | 2     |

| Locus tag | 258/98 | 493/89 | 3072/96 | EDL933 | Sakai |
|-----------|--------|--------|---------|--------|-------|
| ECs3805   | 2      | 2      | 2       | 2      | 2     |
| ECs3807   | 3      | 3      | 3       | 2      | 2     |
| ECs3810   | 3      | 3      | 3       | 22     | 22    |
| ECs3811   | 2      | 2      | 2       | 2      | 2     |
| ECs3812   | 3      | 3      | 3       | 2      | 2     |
| ECs3814   | 2      | 2      | 2       | 2      | 2     |
| ECs3815   | 1      | 1      | 1       | 1      | 1     |
| ECs3816   | 1      | 1      | 1       | 1      | 1     |
| ECs3817   | 2      | 2      | 2       | 2      | 2     |
| ECs3818   | 2      | 2      | 2       | 2      | 2     |
| ECs3819   | 3      | 3      | 3       | 2      | 2     |
| ECs3820   | 3      | 3      | 3       | 2      | 2     |
| ECs3822   | 3      | 3      | 3       | 2      | 2     |
| ECs3824   | 2      | 2      | 2       | 2      | 2     |
| ECs3825   | 2      | 2      | 2       | 2      | 2     |
| ECs3827   | 2      | 2      | 2       | 2      | 2     |
| ECs3828   | 2      | 2      | 2       | 2      | 2     |
| ECs3829   | 2      | 2      | 2       | 2      | 2     |
| ECs3831   | 2      | 2      | 2       | 2      | 2     |
| ECs3832   | 3      | 3      | 3       | 22     | 22    |
| ECs3834   | 2      | 2      | 2       | 2      | 2     |
| ECs3835   | 2      | 2      | 2       | 2      | 2     |
| ECs3836   | 2      | 2      | 2       | 2      | 2     |
| ECs3838   | 2      | 2      | 2       | 2      | 2     |
| ECs3839   | 2      | 2      | 2       | 2      | 2     |
| ECs3841   | 2      | 2      | 2       | 2      | 2     |
| ECs3842   | 2      | 2      | 2       | 2      | 2     |
| ECs3873   | 2      | 2      | 2       | 2      | 2     |
| ECs3874   | 3      | 3      | 3       | 2      | 2     |
| ECs3875   | 2      | 2      | 2       | 2      | 2     |
| ECs3878   | 2      | 2      | 2       | 2      | 2     |
| ECs3879   | 2      | 2      | 2       | 2      | 2     |
| ECs3880   | 2      | 2      | 2       | 17     | 17    |
| ECs3883   | 1      | 1      | 1       | 1      | 1     |
| ECs3884   | 3      | 3      | 3       | 3      | 3     |
| ECs3886   | 2      | 2      | 2       | 2      | 2     |
| ECs3887   | 2      | 2      | 2       | 2      | 2     |
| ECs3889   | 3      | 3      | 3       | 2      | 2     |
| ECs3890   | 2      | 2      | 2       | 2      | 2     |
| ECs3892   | 2      | 2      | 2       | 2      | 2     |
| ECs3893   | 2      | 2      | 2       | 2      | 2     |
| ECs3895   | 2      | 2      | 2       | 2      | 2     |
| ECs3894   | 2      | 2      | 2       | 2      | 2     |
| ECs3896   | 3      | 3      | 3       | 2      | 2     |
| ECs3899   | 2      | 2      | 2       | 2      | 2     |
| ECs3900   | 2      | 2      | 2       | 2      | 2     |
| ECs3901   | 2      | 2      | 2       | 2      | 2     |
| ECs3902   | 3      | 3      | 3       | 2      | 2     |
| ECs3903   | 2      | 2      | 2       | 2      | 2     |
| ECs3905   | 2      | 2      | 2       | 2      | 2     |
| ECs3906   | 1      | 1      | 1       | 1      | 1     |
| ECs3907   | 2      | 2      | 2       | 2      | 2     |
| ECs3910   | 2      | 2      | 2       | 2      | 2     |

| Locus tag | 258/98 | 493/89 | 3072/96 | EDL933 | Sakai |
|-----------|--------|--------|---------|--------|-------|
| ECs3911   | 2      | 2      | 2       | 2      | 2     |
| ECs3918   | 2      | 2      | 2       | 2      | 2     |
| ECs3919   | 2      | 2      | 2       | 2      | 2     |
| ECs3920   | 3      | 3      | 3       | 2      | 2     |
| ECs3921   | 2      | 2      | 2       | 2      | 2     |
| ECs3922   | 2      | 2      | 2       | 2      | 2     |
| ECs3923   | 2      | 2      | 2       | 38     | 2     |
| ECs3925   | 2      | 2      | 2       | 2      | 2     |
| ECs3926   | 2      | 2      | 2       | 18     | 18    |
| ECs3927   | 2      | 2      | 2       | 2      | 2     |
| ECs3929   | 2      | 2      | 2       | 2      | 2     |
| ECs3931   | 3      | 3      | 3       | 2      | 2     |
| ECs3935   | 148    | 3      | 3       | 2      | 2     |
| ECs3936   | 3      | 3      | 3       | 2      | 2     |
| ECs3937   | 2      | 2      | 2       | 2      | 2     |
| ECs3938   | 2      | 2      | 2       | 2      | 2     |
| ECs3939   | 3      | 3      | 3       | 2      | 2     |
| ECs3940   | 2      | 2      | 2       | 2      | 2     |
| ECs3941   | 2      | 2      | 2       | 2      | 2     |
| ECs3942   | 2      | 2      | 2       | 2      | 2     |
| ECs3945   | 2      | 2      | 2       | 2      | 2     |
| ECs3946   | 2      | 2      | 2       | 2      | 2     |
| ECs3947   | 2      | 2      | 2       | 11     | 11    |
| ECs3948   | 1      | 1      | 1       | 1      | 1     |
| ECs3949   | 2      | 2      | 2       | 2      | 2     |
| ECs3950   | 2      | 2      | 2       | 2      | 2     |
| ECs3951   | 2      | 2      | 2       | 2      | 2     |
| ECs3952   | 3      | 3      | 3       | 2      | 2     |
| ECs3953   | 3      | 3      | 3       | 2      | 2     |
| ECs3954   | 3      | 3      | 3       | 2      | 25    |
| ECs3955   | 2      | 2      | 2       | 2      | 2     |
| ECs3956   | 2      | 2      | 2       | 2      | 2     |
| ECs3957   | 2      | 2      | 2       | 2      | 2     |
| ECs3958   | 3      | 3      | 3       | 2      | 2     |
| ECs3960   | 3      | 3      | 3       | 2      | 2     |
| ECs3961   | 3      | 3      | 3       | 2      | 2     |
| ECs3962   | 3      | 3      | 3       | 2      | 2     |
| ECs3963   | 3      | 3      | 3       | 4      | 4     |
| ECs3966   | 3      | 3      | 3       | 2      | 2     |
| ECs3967   | 2      | 2      | 2       | 2      | 2     |
| ECs3969   | 2      | 2      | 2       | 2      | 2     |
| ECs3970   | 3      | 3      | 3       | 3      | 3     |
| ECs3971   | 2      | 2      | 2       | 2      | 2     |
| ECs3972   | 3      | 3      | 3       | 3      | 3     |
| ECs3973   | 3      | 3      | 3       | 20     | 20    |
| ECs3974   | 3      | 3      | 3       | 2      | 2     |
| ECs3975   | 2      | 2      | 2       | 2      | 2     |
| ECs3976   | 2      | 2      | 2       | 2      | 2     |
| ECs3977   | 2      | 2      | 2       | 2      | 2     |
| ECs3978   | 2      | 2      | 2       | 2      | 2     |
| ECs3979   | 3      | 3      | 3       | 2      | 2     |
| ECs3980   | 2      | 2      | 2       | 2      | 2     |
| ECs3981   | 2      | 2      | 2       | 2      | 2     |

| Locus tag | 258/98 | 493/89 | 3072/96 | EDL933 | Sakai |
|-----------|--------|--------|---------|--------|-------|
| ECs3983   | 2      | 2      | 2       | 2      | 2     |
| ECs3985   | 2      | 2      | 2       | 2      | 2     |
| ECs3987   | 4      | 4      | 3       | 2      | 2     |
| ECs3988   | 2      | 2      | 3       | 2      | 2     |
| ECs3989   | 2      | 2      | 2       | 2      | 2     |
| ECs3990   | 2      | 2      | 2       | 2      | 2     |
| ECs3992   | 3      | 3      | 3       | 15     | 15    |
| ECs3993   | 2      | 2      | 2       | 2      | 2     |
| ECs3994   | 3      | 3      | 3       | 2      | 2     |
| ECs3996   | 2      | 2      | 2       | 2      | 2     |
| ECs4002   | 2      | 2      | 2       | 2      | 2     |
| ECs4003   | 2      | 2      | 2       | 2      | 2     |
| ECs4004   | 3      | 3      | 3       | 3      | 3     |
| ECs4006   | 2      | 2      | 2       | 2      | 2     |
| ECs4009   | 2      | 2      | 2       | 2      | 2     |
| ECs4010   | 2      | 2      | 2       | 2      | 2     |
| ECs4011   | 2      | 2      | 2       | 2      | 2     |
| ECs4016   | 2      | 2      | 2       | 2      | 2     |
| ECs4017   | 3      | 3      | 3       | 2      | 2     |
| ECs4018   | 2      | 2      | 2       | 2      | 2     |
| ECs4019   | 2      | 2      | 2       | 2      | 2     |
| ECs4027   | 2      | 2      | 2       | 2      | 2     |
| ECs4030   | 2      | 2      | 2       | 2      | 2     |
| ECs4031   | 2      | 2      | 2       | 2      | 2     |
| ECs4032   | 3      | 3      | 3       | 2      | 2     |
| ECs4038   | 2      | 2      | 2       | 2      | 2     |
| ECs4039   | 2      | 2      | 2       | 2      | 2     |
| ECs4041   | 2      | 2      | 2       | 18     | 18    |
| ECs4042   | 3      | 3      | 3       | 2      | 2     |
| ECs4043   | 2      | 2      | 2       | 2      | 2     |
| ECs4044   | 1      | 1      | 1       | 1      | 1     |
| ECs4045   | 2      | 2      | 2       | 2      | 2     |
| ECs4046   | 1      | 1      | 1       | 2      | 2     |
| ECs4047   | 2      | 2      | 2       | 2      | 2     |
| ECs4048   | 2      | 2      | 2       | 2      | 2     |
| ECs4049   | 3      | 3      | 3       | 2      | 2     |
| ECs4050   | 2      | 2      | 2       | 2      | 2     |
| ECs4051   | 1      | 1      | 1       | 2      | 2     |
| ECs4052   | 2      | 2      | 2       | 2      | 2     |
| ECs4054   | 2      | 2      | 2       | 2      | 2     |
| ECs4055   | 3      | 3      | 3       | 2      | 2     |
| ECs4057   | 3      | 3      | 3       | 2      | 2     |
| ECs4058   | 1      | 1      | 1       | 1      | 1     |
| ECs4059   | 1      | 1      | 1       | 1      | 1     |
| ECs4060   | 2      | 2      | 2       | 2      | 2     |
| ECs4061   | 2      | 2      | 2       | 2      | 2     |
| ECs4062   | 3      | 3      | 3       | 3      | 3     |
| ECs4063   | 3      | 3      | 3       | 3      | 3     |
| ECs4064   | 1      | 1      | 1       | 1      | 1     |
| ECs4065   | 1      | 1      | 1       | 1      | 1     |
| ECs4066   | 2      | 2      | 2       | 2      | 2     |
| ECs4067   | 2      | 2      | 2       | 2      | 13    |
| ECs4068   | 2      | 2      | 2       | 2      | 2     |

| Locus tag | 258/98 | 493/89 | 3072/96 | EDL933 | Sakai |
|-----------|--------|--------|---------|--------|-------|
| ECs4069   | 1      | 1      | 1       | 1      | 1     |
| ECs4070   | 2      | 2      | 2       | 2      | 2     |
| ECs4071   | 2      | 2      | 2       | 2      | 2     |
| ECs4072   | 2      | 2      | 2       | 2      | 2     |
| ECs4073   | 3      | 3      | 3       | 2      | 2     |
| ECs4074   | 2      | 2      | 2       | 2      | 2     |
| ECs4075   | 3      | 3      | 3       | 2      | 2     |
| ECs4076   | 3      | 3      | 3       | 2      | 2     |
| ECs4077   | 2      | 2      | 2       | 2      | 2     |
| ECs4078   | 2      | 2      | 2       | 2      | 2     |
| ECs4080   | 3      | 3      | 3       | 12     | 12    |
| ECs4081   | 2      | 2      | 2       | 2      | 2     |
| ECs4082   | 1      | 1      | 1       | 1      | 1     |
| ECs4083   | 2      | 2      | 2       | 2      | 2     |
| ECs4084   | 2      | 2      | 2       | 2      | 2     |
| ECs4086   | 2      | 2      | 2       | 2      | 2     |
| ECs4087   | 3      | 3      | 3       | 2      | 2     |
| ECs4088   | 2      | 2      | 2       | 2      | 2     |
| ECs4089   | 81     | 3      | 3       | 2      | 2     |
| ECs4090   | 2      | 2      | 2       | 2      | 2     |
| ECs4091   | 3      | 3      | 3       | 2      | 32    |
| ECs4092   | 2      | 2      | 2       | 2      | 2     |
| ECs4094   | 2      | 2      | 2       | 2      | 2     |
| ECs4095   | 3      | 3      | 3       | 2      | 2     |
| ECs4096   | 3      | 3      | 3       | 2      | 2     |
| ECs4097   | 3      | 3      | 3       | 2      | 2     |
| ECs4098   | 2      | 2      | 2       | 2      | 2     |
| ECs4099   | 2      | 2      | 2       | 2      | 2     |
| ECs4101   | 2      | 2      | 2       | 2      | 2     |
| ECs4102   | 2      | 2      | 2       | 2      | 2     |
| ECs4103   | 3      | 3      | 3       | 2      | 2     |
| ECs4104   | 1      | 1      | 1       | 1      | 1     |
| ECs4105   | 3      | 3      | 3       | 2      | 2     |
| ECs4106   | 2      | 2      | 2       | 2      | 2     |
| ECs4107   | 3      | 3      | 3       | 2      | 2     |
| ECs4108   | 2      | 2      | 2       | 2      | 2     |
| ECs4109   | 3      | 3      | 3       | 2      | 2     |
| ECs4110   | 2      | 2      | 2       | 2      | 2     |
| ECs4111   | 1      | 1      | 1       | 1      | 1     |
| ECs4112   | 1      | 1      | 1       | 1      | 1     |
| ECs4113   | 3      | 3      | 3       | 2      | 2     |
| ECs4114   | 3      | 3      | 3       | 2      | 2     |
| ECs4115   | 2      | 2      | 2       | 2      | 2     |
| ECs4116   | 2      | 2      | 2       | 2      | 2     |
| ECs4117   | 3      | 3      | 3       | 2      | 2     |
| ECs4118   | 2      | 2      | 2       | 2      | 2     |
| ECs4119   | 2      | 2      | 2       | 2      | 2     |
| ECs4121   | 2      | 2      | 2       | 2      | 2     |
| ECs4123   | 3      | 49     | 3       | 3      | 3     |
| ECs4124   | 2      | 2      | 2       | 2      | 2     |
| ECs4125   | 2      | 2      | 2       | 2      | 2     |
| ECs4127   | 2      | 2      | 2       | 2      | 2     |
| ECs4128   | 3      | 3      | 3       | 2      | 2     |

| Locus tag | 258/98 | 493/89 | 3072/96 | EDL933 | Sakai |
|-----------|--------|--------|---------|--------|-------|
| ECs4130   | 3      | 3      | 3       | 21     | 21    |
| ECs4131   | 2      | 2      | 2       | 2      | 2     |
| ECs4132   | 1      | 1      | 1       | 1      | 1     |
| ECs4133   | 1      | 1      | 1       | 1      | 1     |
| ECs4144   | 2      | 2      | 2       | 2      | 2     |
| ECs4145   | 2      | 2      | 2       | 2      | 2     |
| ECs4147   | 2      | 2      | 2       | 2      | 2     |
| ECs4148   | 2      | 2      | 2       | 2      | 2     |
| ECs4149   | 2      | 2      | 2       | 2      | 2     |
| ECs4151   | 3      | 3      | 3       | 3      | 3     |
| ECs4152   | 2      | 2      | 2       | 2      | 2     |
| ECs4153   | 2      | 2      | 2       | 2      | 2     |
| ECs4154   | 3      | 3      | 3       | 2      | 18    |
| ECs4155   | 2      | 2      | 2       | 2      | 19    |
| ECs4156   | 2      | 2      | 2       | 2      | 2     |
| ECs5530   | 2      | 2      | 2       | 2      | 2     |
| ECs4158   | 2      | 2      | 2       | 2      | 2     |
| ECs4159   | 1      | 1      | 1       | 1      | 1     |
| ECs4160   | 1      | 1      | 1       | 1      | 1     |
| ECs4161   | 1      | 1      | 1       | 1      | 1     |
| ECs4162   | 2      | 13     | 2       | 2      | 2     |
| ECs4163   | 1      | 1      | 1       | 1      | 1     |
| ECs4164   | 1      | 1      | 1       | 1      | 1     |
| ECs4165   | 2      | 2      | 2       | 2      | 2     |
| ECs4166   | 3      | 3      | 3       | 2      | 2     |
| ECs4167   | 1      | 1      | 1       | 1      | 1     |
| ECs4168   | 2      | 2      | 2       | 2      | 2     |
| ECs4169   | 1      | 1      | 1       | 1      | 1     |
| ECs4170   | 1      | 1      | 1       | 1      | 1     |
| ECs4171   | 1      | 1      | 1       | 1      | 1     |
| ECs4172   | 1      | 1      | 1       | 1      | 1     |
| ECs4173   | 1      | 1      | 1       | 1      | 1     |
| ECs4174   | 2      | 2      | 2       | 2      | 2     |
| ECs4175   | 1      | 1      | 1       | 1      | 1     |
| ECs4176   | 1      | 1      | 1       | 1      | 1     |
| ECs4177   | 2      | 2      | 2       | 2      | 2     |
| ECs4178   | 2      | 2      | 2       | 2      | 2     |
| ECs4179   | 1      | 1      | 1       | 1      | 1     |
| ECs4180   | 1      | 1      | 1       | 1      | 1     |
| ECs4181   | 2      | 2      | 2       | 2      | 2     |
| ECs4182   | 2      | 2      | 2       | 2      | 2     |
| ECs4183   | 1      | 1      | 1       | 1      | 1     |
| ECs4184   | 1      | 1      | 1       | 1      | 1     |
| ECs4185   | 1      | 1      | 1       | 2      | 2     |
| ECs4186   | 1      | 1      | 1       | 1      | 1     |
| ECs4191   | 3      | 3      | 3       | 2      | 2     |
| ECs4192   | 1      | 1      | 1       | 1      | 1     |
| ECs4193   | 1      | 1      | 1       | 1      | 1     |
| ECs4194   | 3      | 3      | 3       | 2      | 2     |
| ECs4195   | 3      | 3      | 3       | 2      | 2     |
| ECs4196   | 3      | 3      | 3       | 2      | 2     |
| ECs4197   | 2      | 2      | 2       | 2      | 2     |
| ECs4198   | 2      | 2      | 2       | 2      | 2     |



| Locus tag | 258/98 | 493/89 | 3072/96 | EDL933 | Sakai |
|-----------|--------|--------|---------|--------|-------|
| ECs4199   | 1      | 1      | 1       | 1      | 1     |
| ECs4200   | 2      | 2      | 2       | 2      | 2     |
| ECs5532   | 2      | 2      | 2       | 2      | 2     |
| ECs4203   | 3      | 3      | 3       | 2      | 2     |
| ECs4204   | 3      | 3      | 3       | 2      | 2     |
| ECs4206   | 3      | 3      | 3       | 2      | 2     |
| ECs4207   | 2      | 2      | 2       | 2      | 2     |
| ECs4208   | 2      | 2      | 2       | 2      | 2     |
| ECs4209   | 2      | 2      | 2       | 2      | 2     |
| ECs4210   | 2      | 2      | 2       | 2      | 2     |
| ECs4211   | 3      | 3      | 3       | 2      | 2     |
| ECs4212   | 2      | 2      | 2       | 2      | 2     |
| ECs4214   | 3      | 3      | 3       | 2      | 2     |
| ECs4215   | 2      | 2      | 2       | 2      | 2     |
| ECs4216   | 2      | 2      | 3       | 2      | 30    |
| ECs4217   | 1      | 1      | 1       | 1      | 1     |
| ECs4218   | 2      | 2      | 2       | 2      | 2     |
| ECs4219   | 2      | 2      | 2       | 2      | 2     |
| ECs4226   | 3      | 3      | 3       | 2      | 2     |
| ECs4228   | 2      | 2      | 2       | 2      | 2     |
| ECs4229   | 3      | 3      | 3       | 3      | 3     |
| ECs4230   | 148    | 3      | 3       | 2      | 2     |
| ECs4231   | 2      | 2      | 2       | 2      | 2     |
| ECs4232   | 2      | 2      | 2       | 2      | 2     |
| ECs4233   | 3      | 3      | 3       | 2      | 2     |
| ECs4238   | 3      | 3      | 3       | 25     | 25    |
| ECs4239   | 2      | 2      | 2       | 2      | 2     |
| ECs4240   | 3      | 3      | 3       | 2      | 2     |
| ECs4241   | 2      | 2      | 2       | 2      | 2     |
| ECs4242   | 2      | 2      | 2       | 2      | 2     |
| ECs4243   | 3      | 3      | 3       | 3      | 3     |
| ECs4244   | 3      | 3      | 3       | 2      | 2     |
| ECs4245   | 2      | 2      | 2       | 2      | 2     |
| ECs4246   | 3      | 3      | 3       | 2      | 2     |
| ECs4247   | 2      | 2      | 2       | 2      | 2     |
| ECs4248   | 2      | 2      | 2       | 2      | 2     |
| ECs4252   | 2      | 2      | 2       | 2      | 2     |
| ECs4255   | 2      | 2      | 2       | 2      | 2     |
| ECs4254   | 2      | 2      | 2       | 2      | 2     |
| ECs4256   | 2      | 2      | 2       | 2      | 2     |
| ECs4258   | 158    | 3      | 3       | 2      | 2     |
| ECs4259   | 2      | 2      | 2       | 2      | 2     |
| ECs4267   | 3      | 3      | 3       | 3      | 3     |
| ECs4268   | 2      | 2      | 2       | 2      | 2     |
| ECs4269   | 2      | 2      | 2       | 2      | 2     |
| ECs4273   | 2      | 2      | 2       | 2      | 2     |
| ECs4274   | 2      | 2      | 2       | 2      | 2     |
| ECs4275   | 2      | 2      | 2       | 2      | 2     |
| ECs4276   | 2      | 2      | 2       | 2      | 2     |
| ECs4277   | 3      | 3      | 3       | 3      | 3     |
| ECs4278   | 58     | 2      | 2       | 2      | 2     |
| ECs4279   | 2      | 2      | 2       | 2      | 2     |
| ECs4285   | 2      | 2      | 2       | 2      | 2     |

| Locus tag | 258/98 | 493/89 | 3072/96 | EDL933 | Sakai |
|-----------|--------|--------|---------|--------|-------|
| ECs4286   | 2      | 2      | 2       | 2      | 2     |
| ECs4287   | 2      | 2      | 2       | 2      | 2     |
| ECs4288   | 2      | 2      | 2       | 2      | 2     |
| ECs4289   | 3      | 3      | 3       | 2      | 2     |
| ECs4293   | 3      | 3      | 3       | 24     | 24    |
| ECs4295   | 2      | 2      | 2       | 2      | 2     |
| ECs4296   | 3      | 3      | 3       | 2      | 2     |
| ECs4297   | 2      | 2      | 2       | 2      | 2     |
| ECs4298   | 3      | 3      | 3       | 2      | 2     |
| ECs4299   | 2      | 2      | 2       | 2      | 2     |
| ECs4301   | 2      | 2      | 2       | 2      | 2     |
| ECs4302   | 2      | 2      | 2       | 2      | 2     |
| ECs4303   | 2      | 2      | 2       | 2      | 2     |
| ECs4304   | 2      | 2      | 2       | 2      | 2     |
| ECs4305   | 2      | 2      | 2       | 22     | 22    |
| ECs4306   | 2      | 2      | 2       | 2      | 2     |
| ECs4309   | 2      | 2      | 2       | 2      | 2     |
| ECs4310   | 2      | 2      | 2       | 2      | 2     |
| ECs4311   | 3      | 3      | 3       | 21     | 21    |
| ECs4314   | 2      | 2      | 2       | 2      | 2     |
| ECs4317   | 2      | 2      | 2       | 29     | 2     |
| ECs4318   | 121    | 2      | 2       | 2      | 2     |
| ECs4319   | 2      | 2      | 2       | 2      | 2     |
| ECs4320   | 2      | 2      | 2       | 2      | 2     |
| ECs4321   | 2      | 2      | 2       | 2      | 2     |
| ECs4322   | 3      | 3      | 3       | 22     | 22    |
| ECs4323   | 2      | 2      | 2       | 2      | 2     |
| ECs4342   | 2      | 2      | 2       | 2      | 2     |
| ECs4343   | 2      | 2      | 2       | 22     | 22    |
| ECs4344   | 3      | 3      | 3       | 2      | 2     |
| ECs4345   | 2      | 2      | 2       | 2      | 2     |
| ECs4347   | 2      | 2      | 2       | 2      | 2     |
| ECs4348   | 2      | 2      | 2       | 2      | 2     |
| ECs4358   | 2      | 2      | 2       | 2      | 2     |
| ECs4359   | 2      | 2      | 2       | 2      | 2     |
| ECs4365   | 2      | 2      | 2       | 2      | 2     |
| ECs4366   | 2      | 2      | 2       | 2      | 2     |
| ECs4367   | 2      | 2      | 2       | 2      | 2     |
| ECs4368   | 3      | 3      | 3       | 2      | 2     |
| ECs4369   | 2      | 2      | 2       | 2      | 2     |
| ECs4370   | 2      | 2      | 2       | 2      | 2     |
| ECs4371   | 2      | 2      | 2       | 2      | 2     |
| ECs4372   | 2      | 2      | 2       | 2      | 2     |
| ECs4375   | 2      | 2      | 2       | 2      | 2     |
| ECs4377   | 2      | 2      | 2       | 2      | 2     |
| ECs4378   | 2      | 2      | 2       | 2      | 2     |
| ECs4389   | 3      | 3      | 3       | 2      | 2     |
| ECs4390   | 1      | 1      | 1       | 1      | 1     |
| ECs5533   | 2      | 2      | 2       | 2      | 2     |
| ECs4393   | 3      | 3      | 3       | 2      | 2     |
| ECs4394   | 2      | 2      | 2       | 2      | 2     |
| ECs4395   | 2      | 2      | 2       | 2      | 2     |
| ECs4398   | 2      | 2      | 2       | 2      | 2     |

| Locus tag | 258/98 | 493/89 | 3072/96 | EDL933 | Sakai |
|-----------|--------|--------|---------|--------|-------|
| ECs4399   | 2      | 2      | 2       | 2      | 2     |
| ECs4400   | 3      | 3      | 3       | 2      | 2     |
| ECs4401   | 2      | 2      | 2       | 2      | 2     |
| ECs4402   | 2      | 2      | 2       | 2      | 2     |
| ECs4403   | 3      | 3      | 3       | 2      | 2     |
| ECs4404   | 2      | 2      | 2       | 2      | 2     |
| ECs4405   | 2      | 2      | 2       | 2      | 2     |
| ECs4406   | 71     | 2      | 2       | 2      | 2     |
| ECs4407   | 2      | 2      | 2       | 2      | 2     |
| ECs4408   | 1      | 1      | 1       | 2      | 2     |
| ECs4409   | 3      | 3      | 3       | 2      | 2     |
| ECs4419   | 3      | 3      | 3       | 2      | 2     |
| ECs4420   | 3      | 3      | 3       | 35     | 2     |
| ECs4421   | 2      | 2      | 2       | 2      | 2     |
| ECs4422   | 2      | 2      | 2       | 2      | 2     |
| ECs4423   | 3      | 3      | 3       | 2      | 2     |
| ECs4424   | 2      | 2      | 2       | 2      | 2     |
| ECs4425   | 2      | 2      | 2       | 2      | 22    |
| ECs4432   | 3      | 3      | 3       | 2      | 2     |
| ECs4433   | 2      | 2      | 2       | 2      | 2     |
| ECs4434   | 3      | 3      | 3       | 3      | 3     |
| ECs4437   | 2      | 2      | 2       | 2      | 2     |
| ECs4438   | 5      | 5      | 3       | 2      | 2     |
| ECs4439   | 2      | 2      | 2       | 2      | 2     |
| ECs4440   | 1      | 1      | 1       | 1      | 1     |
| ECs4441   | 2      | 2      | 2       | 2      | 2     |
| ECs4442   | 2      | 2      | 2       | 2      | 2     |
| ECs4443   | 2      | 2      | 2       | 2      | 2     |
| ECs5536   | 2      | 2      | 2       | 2      | 2     |
| ECs4445   | 1      | 1      | 1       | 1      | 1     |
| ECs4450   | 2      | 2      | 2       | 2      | 2     |
| ECs4452   | 2      | 2      | 2       | 2      | 2     |
| ECs4453   | 3      | 3      | 3       | 2      | 2     |
| ECs4454   | 3      | 3      | 3       | 2      | 2     |
| ECs4455   | 2      | 2      | 2       | 2      | 2     |
| ECs4456   | 2      | 2      | 2       | 2      | 2     |
| ECs4464   | 2      | 2      | 2       | 2      | 2     |
| ECs4466   | 2      | 2      | 2       | 2      | 2     |
| ECs4467   | 3      | 3      | 3       | 2      | 2     |
| ECs4468   | 135    | 2      | 2       | 2      | 2     |
| ECs4469   | 2      | 2      | 2       | 2      | 2     |
| ECs4474   | 2      | 2      | 2       | 2      | 2     |
| ECs4475   | 2      | 2      | 2       | 2      | 2     |
| ECs4476   | 3      | 3      | 3       | 2      | 2     |
| ECs4478   | 2      | 2      | 2       | 2      | 2     |
| ECs4481   | 2      | 2      | 2       | 2      | 2     |
| ECs4482   | 2      | 2      | 2       | 2      | 2     |
| ECs4483   | 2      | 2      | 2       | 2      | 2     |
| ECs4484   | 2      | 2      | 2       | 2      | 2     |
| ECs4485   | 2      | 2      | 2       | 2      | 2     |
| ECs4486   | 103    | 3      | 3       | 2      | 2     |
| ECs4487   | 1      | 1      | 1       | 1      | 1     |
| ECs4488   | 1      | 1      | 1       | 1      | 1     |

| Locus tag | 258/98 | 493/89 | 3072/96 | EDL933 | Sakai |
|-----------|--------|--------|---------|--------|-------|
| ECs4489   | 2      | 2      | 2       | 2      | 2     |
| ECs4490   | 1      | 1      | 1       | 1      | 1     |
| ECs4491   | 3      | 3      | 3       | 2      | 2     |
| ECs4492   | 2      | 2      | 2       | 1      | 1     |
| ECs4494   | 2      | 2      | 2       | 2      | 21    |
| ECs4495   | 2      | 2      | 2       | 2      | 2     |
| ECs4497   | 2      | 2      | 2       | 2      | 2     |
| ECs4498   | 2      | 2      | 2       | 2      | 2     |
| ECs4508   | 2      | 2      | 2       | 2      | 2     |
| ECs4509   | 2      | 2      | 2       | 2      | 2     |
| ECs4510   | 2      | 2      | 2       | 2      | 2     |
| ECs4511   | 1      | 1      | 1       | 1      | 1     |
| ECs4512   | 1      | 1      | 1       | 1      | 1     |
| ECs4513   | 3      | 3      | 3       | 2      | 2     |
| ECs4514   | 3      | 3      | 3       | 3      | 3     |
| ECs4516   | 3      | 3      | 3       | 2      | 2     |
| ECs4517   | 2      | 2      | 2       | 2      | 2     |
| ECs4518   | 2      | 2      | 2       | 2      | 2     |
| ECs4519   | 2      | 2      | 2       | 2      | 2     |
| ECs4521   | 1      | 1      | 1       | 1      | 1     |
| ECs4523   | 2      | 2      | 2       | 2      | 2     |
| ECs4524   | 1      | 1      | 1       | 1      | 1     |
| ECs4525   | 3      | 3      | 3       | 2      | 2     |
| ECs4526   | 2      | 2      | 2       | 2      | 2     |
| ECs4527   | 3      | 3      | 3       | 2      | 2     |
| ECs4529   | 2      | 2      | 2       | 2      | 2     |
| ECs4530   | 2      | 2      | 2       | 2      | 2     |
| ECs4531   | 2      | 2      | 2       | 2      | 2     |
| ECs4533   | 2      | 2      | 2       | 2      | 2     |
| ECs4594   | 2      | 2      | 2       | 2      | 2     |
| ECs4596   | 2      | 2      | 2       | 2      | 2     |
| ECs4599   | 2      | 2      | 2       | 2      | 2     |
| ECs4603   | 3      | 3      | 3       | 3      | 3     |
| ECs4604   | 2      | 2      | 2       | 2      | 2     |
| ECs4605   | 3      | 3      | 3       | 2      | 2     |
| ECs4606   | 2      | 2      | 2       | 2      | 2     |
| ECs4611   | 2      | 2      | 2       | 2      | 2     |
| ECs4612   | 2      | 2      | 2       | 2      | 2     |
| ECs4614   | 2      | 2      | 2       | 2      | 2     |
| ECs4615   | 3      | 3      | 3       | 2      | 2     |
| ECs4616   | 2      | 2      | 2       | 2      | 2     |
| ECs4625   | 2      | 2      | 2       | 2      | 2     |
| ECs4626   | 2      | 2      | 2       | 2      | 2     |
| ECs4627   | 2      | 2      | 2       | 2      | 2     |
| ECs4628   | 2      | 2      | 2       | 2      | 2     |
| ECs4629   | 3      | 3      | 3       | 25     | 25    |
| ECs4630   | 3      | 3      | 3       | 2      | 2     |
| ECs4632   | 2      | 2      | 2       | 2      | 2     |
| ECs4633   | 2      | 2      | 2       | 2      | 2     |
| ECs4634   | 3      | 3      | 3       | 2      | 2     |
| ECs4635   | 2      | 2      | 2       | 2      | 2     |
| ECs4636   | 2      | 2      | 2       | 2      | 2     |
| ECs4637   | 2      | 2      | 2       | 2      | 2     |

| Locus tag | 258/98 | 493/89 | 3072/96 | EDL933 | Sakai |
|-----------|--------|--------|---------|--------|-------|
| ECs4638   | 1      | 1      | 1       | 1      | 1     |
| ECs4639   | 1      | 1      | 1       | 2      | 2     |
| ECs4640   | 2      | 2      | 2       | 2      | 2     |
| ECs4641   | 2      | 2      | 2       | 2      | 2     |
| ECs4649   | 2      | 2      | 2       | 2      | 2     |
| ECs4650   | 3      | 3      | 3       | 2      | 2     |
| ECs4651   | 2      | 2      | 2       | 2      | 2     |
| ECs4660   | 3      | 3      | 3       | 2      | 2     |
| ECs4661   | 2      | 2      | 2       | 2      | 2     |
| ECs4662   | 2      | 2      | 2       | 2      | 2     |
| ECs4663   | 2      | 2      | 2       | 2      | 2     |
| ECs4671   | 2      | 2      | 2       | 2      | 20    |
| ECs4672   | 3      | 3      | 3       | 3      | 3     |
| ECs4673   | 1      | 1      | 1       | 5      | 5     |
| ECs4674   | 2      | 2      | 2       | 2      | 2     |
| ECs4675   | 1      | 1      | 1       | 1      | 1     |
| ECs4676   | 2      | 2      | 2       | 2      | 2     |
| ECs4677   | 3      | 3      | 3       | 2      | 2     |
| ECs4679   | 1      | 1      | 1       | 1      | 1     |
| ECs4680   | 1      | 1      | 1       | 1      | 11    |
| ECs4681   | 2      | 2      | 2       | 2      | 2     |
| ECs4682   | 2      | 2      | 2       | 2      | 2     |
| ECs4683   | 2      | 2      | 2       | 2      | 2     |
| ECs4684   | 2      | 2      | 2       | 2      | 2     |
| ECs4685   | 2      | 2      | 2       | 2      | 2     |
| ECs4686   | 2      | 2      | 2       | 2      | 2     |
| ECs4688   | 3      | 3      | 3       | 2      | 2     |
| ECs4689   | 3      | 3      | 3       | 3      | 3     |
| ECs4691   | 3      | 3      | 3       | 2      | 2     |
| ECs4696   | 2      | 2      | 2       | 2      | 2     |
| ECs4697   | 2      | 2      | 2       | 2      | 2     |
| ECs4698   | 2      | 2      | 2       | 2      | 2     |
| ECs4699   | 2      | 2      | 2       | 2      | 2     |
| ECs4700   | 3      | 3      | 3       | 2      | 2     |
| ECs4701   | 1      | 1      | 1       | 1      | 1     |
| ECs4702   | 3      | 3      | 3       | 2      | 2     |
| ECs4703   | 2      | 2      | 2       | 2      | 2     |
| ECs4704   | 2      | 2      | 2       | 2      | 2     |
| ECs4705   | 2      | 2      | 2       | 2      | 2     |
| ECs4707   | 2      | 2      | 2       | 2      | 2     |
| ECs4708   | 2      | 2      | 2       | 2      | 2     |
| ECs4709   | 2      | 2      | 2       | 2      | 2     |
| ECs4711   | 2      | 2      | 2       | 2      | 2     |
| ECs4712   | 3      | 3      | 3       | 2      | 2     |
| ECs4713   | 2      | 2      | 2       | 17     | 17    |
| ECs4714   | 2      | 2      | 2       | 2      | 2     |
| ECs4715   | 1      | 1      | 1       | 1      | 1     |
| ECs4716   | 3      | 3      | 3       | 3      | 3     |
| ECs5549   | 2      | 2      | 2       | 2      | 2     |
| ECs4717   | 2      | 2      | 2       | 2      | 2     |
| ECs4718   | 2      | 2      | 2       | 2      | 2     |
| ECs4719   | 2      | 2      | 2       | 2      | 2     |
| ECs4720   | 2      | 2      | 2       | 2      | 2     |

| Locus tag | 258/98 | 493/89 | 3072/96 | EDL933 | Sakai |
|-----------|--------|--------|---------|--------|-------|
| ECs4721   | 2      | 2      | 2       | 2      | 2     |
| ECs4722   | 2      | 2      | 2       | 2      | 2     |
| ECs4723   | 2      | 2      | 2       | 2      | 2     |
| ECs4724   | 3      | 3      | 3       | 2      | 2     |
| ECs4725   | 3      | 3      | 3       | 2      | 2     |
| ECs4726   | 3      | 3      | 3       | 21     | 21    |
| ECs4727   | 2      | 2      | 2       | 2      | 2     |
| ECs4728   | 2      | 2      | 2       | 2      | 2     |
| ECs4729   | 2      | 2      | 2       | 2      | 2     |
| ECs4730   | 2      | 2      | 2       | 2      | 2     |
| ECs4732   | 2      | 2      | 2       | 2      | 2     |
| ECs4734   | 2      | 2      | 2       | 2      | 2     |
| ECs4735   | 2      | 2      | 2       | 2      | 2     |
| ECs4736   | 2      | 2      | 2       | 2      | 2     |
| ECs5556   | 2      | 2      | 2       | 2      | 2     |
| ECs4739   | 2      | 2      | 2       | 2      | 2     |
| ECs4740   | 3      | 3      | 3       | 3      | 3     |
| ECs4741   | 2      | 2      | 2       | 2      | 2     |
| ECs4742   | 2      | 2      | 2       | 2      | 2     |
| ECs4743   | 2      | 2      | 2       | 2      | 2     |
| ECs4749   | 3      | 3      | 3       | 3      | 3     |
| ECs4750   | 2      | 2      | 2       | 2      | 2     |
| ECs4751   | 3      | 3      | 3       | 2      | 2     |
| ECs4753   | 2      | 2      | 2       | 2      | 2     |
| ECs4754   | 2      | 2      | 2       | 2      | 2     |
| ECs4755   | 3      | 3      | 3       | 2      | 2     |
| ECs4756   | 2      | 2      | 2       | 18     | 18    |
| ECs4758   | 2      | 2      | 2       | 2      | 2     |
| ECs4759   | 3      | 3      | 3       | 21     | 21    |
| ECs4760   | 2      | 2      | 2       | 2      | 2     |
| ECs4761   | 2      | 2      | 2       | 2      | 2     |
| ECs4762   | 2      | 2      | 2       | 2      | 2     |
| ECs4763   | 2      | 2      | 2       | 2      | 2     |
| ECs4764   | 2      | 2      | 2       | 2      | 2     |
| ECs4765   | 2      | 2      | 2       | 2      | 2     |
| ECs4766   | 1      | 1      | 1       | 1      | 1     |
| ECs4767   | 1      | 1      | 1       | 2      | 2     |
| ECs4768   | 2      | 2      | 2       | 2      | 2     |
| ECs4769   | 2      | 2      | 2       | 2      | 2     |
| ECs4771   | 2      | 2      | 2       | 2      | 2     |
| ECs4772   | 2      | 2      | 2       | 2      | 2     |
| ECs4773   | 3      | 3      | 3       | 2      | 2     |
| ECs4774   | 2      | 2      | 2       | 2      | 2     |
| ECs4775   | 3      | 3      | 3       | 19     | 19    |
| ECs4776   | 2      | 2      | 2       | 2      | 2     |
| ECs4777   | 3      | 3      | 3       | 36     | 2     |
| ECs4778   | 2      | 2      | 2       | 2      | 2     |
| ECs4780   | 3      | 3      | 3       | 2      | 2     |
| ECs4781   | 2      | 2      | 2       | 2      | 2     |
| ECs4782   | 2      | 2      | 2       | 2      | 2     |
| ECs5562   | 3      | 3      | 3       | 2      | 2     |
| ECs4786   | 3      | 3      | 3       | 2      | 2     |
| ECs4787   | 2      | 2      | 2       | 2      | 2     |

| Locus tag | 258/98 | 493/89 | 3072/96 | EDL933 | Sakai |
|-----------|--------|--------|---------|--------|-------|
| ECs4788   | 3      | 3      | 3       | 2      | 2     |
| ECs4789   | 2      | 2      | 2       | 2      | 2     |
| ECs4790   | 3      | 3      | 3       | 2      | 2     |
| ECs4791   | 3      | 3      | 3       | 2      | 2     |
| ECs4792   | 2      | 2      | 2       | 2      | 2     |
| ECs4793   | 3      | 3      | 3       | 2      | 2     |
| ECs4809   | 2      | 2      | 2       | 2      | 2     |
| ECs4810   | 2      | 2      | 2       | 2      | 2     |
| ECs4811   | 2      | 2      | 2       | 2      | 2     |
| ECs4815   | 2      | 2      | 2       | 2      | 2     |
| ECs4817   | 2      | 2      | 2       | 2      | 2     |
| ECs4818   | 1      | 1      | 1       | 2      | 2     |
| ECs4819   | 2      | 2      | 2       | 2      | 2     |
| ECs4821   | 2      | 2      | 2       | 2      | 2     |
| ECs4828   | 2      | 2      | 2       | 2      | 2     |
| ECs4830   | 2      | 2      | 2       | 2      | 2     |
| ECs4831   | 2      | 2      | 2       | 2      | 2     |
| ECs4834   | 3      | 3      | 3       | 13     | 13    |
| ECs4836   | 2      | 2      | 2       | 2      | 2     |
| ECs4837   | 2      | 2      | 2       | 40     | 2     |
| ECs4838   | 2      | 2      | 2       | 2      | 2     |
| ECs4839   | 2      | 2      | 2       | 2      | 2     |
| ECs4840   | 3      | 3      | 3       | 2      | 2     |
| ECs4841   | 2      | 2      | 2       | 2      | 2     |
| ECs4842   | 3      | 3      | 3       | 2      | 2     |
| ECs4843   | 2      | 2      | 2       | 2      | 2     |
| ECs4844   | 2      | 2      | 2       | 2      | 2     |
| ECs4845   | 2      | 2      | 2       | 2      | 2     |
| ECs4846   | 2      | 2      | 2       | 2      | 2     |
| ECs4847   | 2      | 2      | 2       | 2      | 2     |
| ECs4848   | 3      | 3      | 3       | 2      | 2     |
| ECs4849   | 2      | 2      | 2       | 2      | 2     |
| ECs4850   | 3      | 3      | 3       | 2      | 2     |
| ECs4851   | 3      | 3      | 3       | 3      | 3     |
| ECs4852   | 2      | 2      | 2       | 2      | 2     |
| ECs4856   | 2      | 2      | 2       | 2      | 2     |
| ECs4857   | 2      | 2      | 2       | 2      | 2     |
| ECs4858   | 2      | 2      | 2       | 2      | 2     |
| ECs4859   | 2      | 2      | 2       | 2      | 2     |
| ECs4861   | 2      | 2      | 2       | 2      | 2     |
| ECs4862   | 157    | 2      | 2       | 2      | 2     |
| ECs4863   | 1      | 1      | 1       | 1      | 1     |
| ECs4866   | 2      | 2      | 2       | 2      | 2     |
| ECs4867   | 1      | 1      | 1       | 1      | 1     |
| ECs4868   | 3      | 3      | 3       | 41     | 2     |
| ECs4869   | 3      | 3      | 3       | 2      | 2     |
| ECs4870   | 2      | 2      | 2       | 2      | 2     |
| ECs4871   | 5      | 5      | 3       | 5      | 5     |
| ECs4872   | 2      | 2      | 2       | 2      | 2     |
| ECs4873   | 3      | 3      | 3       | 2      | 2     |
| ECs4874   | 2      | 2      | 2       | 2      | 2     |
| ECs4875   | 2      | 2      | 2       | 2      | 2     |
| ECs4877   | 2      | 2      | 2       | 2      | 2     |

| Locus tag | 258/98 | 493/89 | 3072/96 | EDL933 | Sakai |
|-----------|--------|--------|---------|--------|-------|
| ECs4879   | 2      | 2      | 2       | 2      | 2     |
| ECs4880   | 2      | 2      | 2       | 2      | 2     |
| ECs4881   | 2      | 2      | 2       | 2      | 2     |
| ECs4883   | 2      | 2      | 2       | 2      | 2     |
| ECs4884   | 2      | 2      | 2       | 2      | 2     |
| ECs4885   | 3      | 3      | 3       | 2      | 2     |
| ECs4886   | 2      | 2      | 2       | 2      | 2     |
| ECs4887   | 2      | 2      | 2       | 15     | 15    |
| ECs4888   | 2      | 2      | 2       | 2      | 2     |
| ECs4889   | 127    | 3      | 3       | 38     | 19    |
| ECs4891   | 2      | 2      | 2       | 16     | 16    |
| ECs4894   | 2      | 2      | 2       | 2      | 2     |
| ECs4895   | 2      | 2      | 2       | 2      | 2     |
| ECs4896   | 3      | 3      | 3       | 2      | 2     |
| ECs4899   | 2      | 2      | 2       | 2      | 2     |
| ECs4900   | 2      | 2      | 2       | 2      | 2     |
| ECs4904   | 2      | 2      | 2       | 2      | 2     |
| ECs4905   | 1      | 1      | 1       | 1      | 1     |
| ECs4906   | 2      | 2      | 2       | 2      | 2     |
| ECs4907   | 2      | 2      | 2       | 2      | 2     |
| ECs4908   | 1      | 1      | 1       | 1      | 1     |
| ECs4909   | 1      | 1      | 1       | 1      | 1     |
| ECs4910   | 2      | 2      | 2       | 2      | 2     |
| ECs4911   | 3      | 3      | 3       | 2      | 2     |
| ECs4913   | 2      | 2      | 2       | 2      | 2     |
| ECs4914   | 2      | 2      | 2       | 2      | 2     |
| ECs4915   | 2      | 2      | 2       | 2      | 2     |
| ECs4917   | 3      | 3      | 3       | 2      | 2     |
| ECs4918   | 2      | 2      | 2       | 2      | 2     |
| ECs4919   | 2      | 2      | 2       | 2      | 2     |
| ECs4920   | 2      | 2      | 2       | 2      | 2     |
| ECs4921   | 3      | 3      | 3       | 2      | 2     |
| ECs4922   | 2      | 2      | 2       | 2      | 2     |
| ECs4923   | 1      | 1      | 1       | 1      | 1     |
| ECs4924   | 3      | 3      | 3       | 2      | 2     |
| ECs4927   | 3      | 3      | 3       | 2      | 2     |
| ECs4928   | 2      | 2      | 2       | 2      | 2     |
| ECs4929   | 3      | 3      | 3       | 2      | 2     |
| ECs4931   | 2      | 2      | 2       | 2      | 2     |
| ECs4932   | 2      | 2      | 2       | 2      | 2     |
| ECs4933   | 2      | 2      | 2       | 2      | 2     |
| ECs4936   | 2      | 2      | 2       | 2      | 2     |
| ECs4937   | 2      | 2      | 2       | 2      | 2     |
| ECs4938   | 3      | 3      | 3       | 2      | 2     |
| ECs4939   | 2      | 2      | 2       | 2      | 2     |
| ECs5005   | 2      | 2      | 2       | 2      | 2     |
| ECs5007   | 2      | 2      | 2       | 2      | 2     |
| ECs5008   | 3      | 3      | 3       | 2      | 2     |
| ECs5009   | 2      | 2      | 2       | 2      | 2     |
| ECs5010   | 2      | 2      | 2       | 2      | 2     |
| ECs5011   | 2      | 2      | 2       | 21     | 21    |
| ECs5012   | 3      | 3      | 3       | 23     | 23    |
| ECs5013   | 2      | 2      | 2       | 2      | 2     |



| Locus tag | 258/98 | 493/89 | 3072/96 | EDL933 | Sakai |
|-----------|--------|--------|---------|--------|-------|
| ECs5016   | 3      | 3      | 3       | 2      | 2     |
| ECs5017   | 3      | 3      | 3       | 2      | 2     |
| ECs5018   | 2      | 2      | 2       | 2      | 2     |
| ECs5019   | 2      | 2      | 2       | 2      | 2     |
| ECs5022   | 2      | 2      | 2       | 2      | 12    |
| ECs5023   | 2      | 2      | 2       | 2      | 2     |
| ECs5024   | 2      | 2      | 2       | 2      | 2     |
| ECs5025   | 2      | 2      | 2       | 2      | 2     |
| ECs5026   | 2      | 2      | 2       | 2      | 2     |
| ECs5027   | 3      | 3      | 3       | 2      | 2     |
| ECs5028   | 1      | 1      | 1       | 1      | 1     |
| ECs5029   | 2      | 2      | 2       | 2      | 2     |
| ECs5032   | 3      | 3      | 3       | 3      | 3     |
| ECs5034   | 2      | 2      | 2       | 2      | 2     |
| ECs5036   | 2      | 2      | 2       | 2      | 2     |
| ECs5037   | 3      | 3      | 3       | 3      | 3     |
| ECs5038   | 1      | 1      | 1       | 1      | 1     |
| ECs5040   | 2      | 2      | 2       | 2      | 2     |
| ECs5041   | 3      | 3      | 3       | 3      | 3     |
| ECs5042   | 2      | 2      | 2       | 2      | 2     |
| ECs5043   | 3      | 3      | 3       | 23     | 23    |
| ECs5044   | 2      | 2      | 2       | 2      | 2     |
| ECs5045   | 2      | 2      | 2       | 2      | 2     |
| ECs5046   | 3      | 3      | 3       | 3      | 3     |
| ECs5047   | 2      | 2      | 2       | 2      | 2     |
| ECs5049   | 3      | 3      | 3       | 2      | 2     |
| ECs5050   | 2      | 2      | 2       | 2      | 2     |
| ECs5051   | 2      | 2      | 2       | 2      | 2     |
| ECs5052   | 2      | 2      | 2       | 2      | 2     |
| ECs5054   | 2      | 2      | 2       | 2      | 2     |
| ECs5055   | 3      | 3      | 3       | 2      | 2     |
| ECs5056   | 3      | 3      | 3       | 3      | 3     |
| ECs5058   | 2      | 2      | 2       | 2      | 2     |
| ECs5059   | 2      | 2      | 2       | 2      | 2     |
| ECs5060   | 2      | 2      | 2       | 2      | 2     |
| ECs5062   | 2      | 2      | 2       | 2      | 2     |
| ECs5063   | 3      | 3      | 3       | 2      | 2     |
| ECs5064   | 3      | 3      | 3       | 2      | 2     |
| ECs5065   | 2      | 2      | 2       | 2      | 2     |
| ECs5075   | 2      | 2      | 2       | 2      | 2     |
| ECs5077   | 2      | 2      | 2       | 2      | 2     |
| ECs5078   | 3      | 3      | 3       | 2      | 2     |
| ECs5079   | 2      | 2      | 2       | 2      | 2     |
| ECs5082   | 2      | 2      | 2       | 21     | 21    |
| ECs5083   | 2      | 2      | 2       | 2      | 2     |
| ECs5085   | 3      | 3      | 3       | 2      | 2     |
| ECs5087   | 3      | 3      | 3       | 2      | 2     |
| ECs5089   | 2      | 2      | 2       | 2      | 2     |
| ECs5090   | 2      | 2      | 2       | 2      | 2     |
| ECs5091   | 2      | 2      | 2       | 2      | 2     |
| ECs5092   | 2      | 2      | 2       | 2      | 2     |
| ECs5093   | 2      | 2      | 2       | 2      | 2     |
| ECs5094   | 2      | 2      | 2       | 2      | 2     |

| Locus tag | 258/98 | 493/89 | 3072/96 | EDL933 | Sakai |
|-----------|--------|--------|---------|--------|-------|
| ECs5095   | 2      | 2      | 2       | 2      | 2     |
| ECs5096   | 3      | 3      | 3       | 2      | 25    |
| ECs5097   | 3      | 3      | 3       | 3      | 3     |
| ECs5098   | 3      | 3      | 3       | 2      | 2     |
| ECs5099   | 2      | 2      | 2       | 2      | 2     |
| ECs5100   | 3      | 3      | 3       | 2      | 2     |
| ECs5101   | 2      | 2      | 2       | 2      | 2     |
| ECs5103   | 2      | 2      | 2       | 2      | 2     |
| ECs5104   | 3      | 3      | 3       | 23     | 23    |
| ECs5105   | 2      | 2      | 2       | 38     | 2     |
| ECs5106   | 2      | 2      | 2       | 2      | 2     |
| ECs5107   | 2      | 2      | 2       | 2      | 2     |
| ECs5116   | 2      | 2      | 2       | 2      | 2     |
| ECs5117   | 3      | 3      | 3       | 25     | 25    |
| ECs5119   | 2      | 2      | 2       | 2      | 2     |
| ECs5120   | 2      | 2      | 2       | 2      | 2     |
| ECs5121   | 2      | 2      | 2       | 2      | 2     |
| ECs5122   | 3      | 3      | 3       | 18     | 18    |
| ECs5123   | 2      | 2      | 2       | 2      | 2     |
| ECs5124   | 3      | 3      | 3       | 2      | 2     |
| ECs5125   | 2      | 2      | 2       | 2      | 2     |
| ECs5127   | 2      | 2      | 2       | 2      | 2     |
| ECs5128   | 2      | 2      | 2       | 2      | 2     |
| ECs5586   | 2      | 2      | 2       | 2      | 2     |
| ECs5129   | 3      | 3      | 3       | 2      | 2     |
| ECs5130   | 2      | 2      | 2       | 2      | 2     |
| ECs5131   | 2      | 2      | 2       | 2      | 2     |
| ECs5132   | 2      | 2      | 2       | 2      | 2     |
| ECs5133   | 2      | 2      | 2       | 2      | 2     |
| ECs5136   | 2      | 2      | 2       | 2      | 2     |
| ECs5137   | 2      | 2      | 2       | 1      | 1     |
| ECs5138   | 3      | 45     | 3       | 2      | 2     |
| ECs5139   | 2      | 2      | 2       | 2      | 2     |
| ECs5140   | 2      | 2      | 2       | 2      | 2     |
| ECs5141   | 2      | 2      | 2       | 2      | 2     |
| ECs5143   | 3      | 3      | 3       | 21     | 21    |
| ECs5142   | 1      | 1      | 1       | 1      | 1     |
| ECs5145   | 3      | 3      | 3       | 2      | 2     |
| ECs5146   | 3      | 3      | 3       | 25     | 25    |
| ECs5148   | 1      | 1      | 1       | 1      | 1     |
| ECs5149   | 2      | 2      | 2       | 2      | 2     |
| ECs5150   | 2      | 2      | 2       | 2      | 2     |
| ECs5151   | 2      | 2      | 2       | 2      | 2     |
| ECs5152   | 1      | 1      | 1       | 1      | 1     |
| ECs5153   | 2      | 2      | 2       | 2      | 2     |
| ECs5154   | 2      | 2      | 2       | 2      | 2     |
| ECs5156   | 2      | 2      | 2       | 2      | 2     |
| ECs5157   | 2      | 2      | 2       | 2      | 2     |
| ECs5158   | 2      | 2      | 2       | 2      | 2     |
| ECs5159   | 3      | 3      | 3       | 2      | 2     |
| ECs5160   | 2      | 2      | 2       | 2      | 2     |
| ECs5161   | 3      | 3      | 3       | 2      | 2     |
| ECs5162   | 2      | 93     | 2       | 2      | 2     |

| Locus tag | 258/98 | 493/89 | 3072/96 | EDL933 | Sakai |
|-----------|--------|--------|---------|--------|-------|
| ECs5163   | 2      | 2      | 2       | 2      | 2     |
| ECs5164   | 1      | 1      | 1       | 1      | 1     |
| ECs5165   | 2      | 2      | 2       | 2      | 2     |
| ECs5166   | 3      | 3      | 3       | 2      | 2     |
| ECs5167   | 2      | 2      | 2       | 2      | 2     |
| ECs5170   | 2      | 2      | 2       | 2      | 2     |
| ECs5171   | 2      | 2      | 2       | 2      | 2     |
| ECs5172   | 2      | 2      | 2       | 2      | 2     |
| ECs5174   | 2      | 2      | 2       | 2      | 2     |
| ECs5175   | 2      | 2      | 2       | 2      | 2     |
| ECs5176   | 2      | 2      | 2       | 2      | 2     |
| ECs5177   | 2      | 2      | 2       | 2      | 2     |
| ECs5178   | 1      | 1      | 1       | 1      | 1     |
| ECs5179   | 2      | 2      | 2       | 2      | 2     |
| ECs5185   | 2      | 2      | 2       | 2      | 2     |
| ECs5187   | 2      | 2      | 2       | 2      | 2     |
| ECs5188   | 2      | 2      | 2       | 2      | 2     |
| ECs5190   | 2      | 2      | 2       | 2      | 2     |
| ECs5189   | 2      | 2      | 2       | 2      | 2     |
| ECs5191   | 2      | 2      | 2       | 2      | 2     |
| ECs5192   | 2      | 2      | 2       | 2      | 2     |
| ECs5194   | 1      | 1      | 1       | 1      | 1     |
| ECs5195   | 2      | 2      | 2       | 2      | 2     |
| ECs5196   | 2      | 2      | 2       | 2      | 2     |
| ECs5197   | 2      | 2      | 2       | 2      | 2     |
| ECs5198   | 2      | 2      | 2       | 2      | 2     |
| ECs5199   | 3      | 3      | 3       | 30     | 30    |
| ECs5200   | 2      | 2      | 2       | 2      | 2     |
| ECs5204   | 2      | 2      | 2       | 2      | 2     |
| ECs5205   | 2      | 2      | 2       | 2      | 2     |
| ECs5206   | 3      | 3      | 3       | 21     | 21    |
| ECs5209   | 3      | 3      | 3       | 2      | 2     |
| ECs5210   | 2      | 2      | 2       | 2      | 24    |
| ECs5211   | 2      | 2      | 2       | 2      | 2     |
| ECs5212   | 2      | 2      | 2       | 2      | 2     |
| ECs5214   | 3      | 3      | 3       | 2      | 2     |
| ECs5215   | 3      | 3      | 3       | 2      | 2     |
| ECs5216   | 3      | 3      | 3       | 26     | 26    |
| ECs5218   | 2      | 2      | 2       | 20     | 20    |
| ECs5219   | 2      | 2      | 2       | 2      | 2     |
| ECs5220   | 2      | 2      | 2       | 2      | 2     |
| ECs5221   | 2      | 2      | 2       | 2      | 2     |
| ECs5222   | 3      | 3      | 3       | 2      | 2     |
| ECs5224   | 1      | 1      | 1       | 1      | 1     |
| ECs5235   | 3      | 3      | 3       | 2      | 2     |
| ECs5236   | 2      | 2      | 2       | 2      | 2     |
| ECs5237   | 2      | 2      | 2       | 2      | 2     |
| ECs5238   | 2      | 2      | 2       | 2      | 2     |
| ECs5239   | 2      | 2      | 2       | 2      | 2     |
| ECs5240   | 3      | 3      | 3       | 3      | 3     |
| ECs5320   | 2      | 2      | 2       | 2      | 2     |
| ECs5321   | 1      | 1      | 1       | 2      | 2     |
| ECs5322   | 2      | 2      | 2       | 2      | 2     |

| Locus tag | 258/98 | 493/89 | 3072/96 | EDL933 | Sakai |
|-----------|--------|--------|---------|--------|-------|
| ECs5324   | 3      | 3      | 3       | 2      | 2     |
| ECs5326   | 3      | 3      | 3       | 3      | 3     |
| ECs5327   | 2      | 2      | 2       | 2      | 2     |
| ECs5328   | 2      | 2      | 2       | 2      | 2     |
| ECs5329   | 3      | 3      | 3       | 2      | 2     |
| ECs5331   | 2      | 2      | 2       | 2      | 2     |
| ECs5332   | 2      | 2      | 2       | 2      | 2     |
| ECs5334   | 2      | 2      | 2       | 2      | 2     |
| ECs5335   | 2      | 2      | 2       | 2      | 2     |
| ECs5336   | 3      | 3      | 3       | 2      | 2     |
| ECs5337   | 3      | 3      | 3       | 3      | 3     |
| ECs5340   | 2      | 2      | 2       | 2      | 2     |
| ECs5341   | 2      | 2      | 2       | 2      | 2     |
| ECs5342   | 3      | 3      | 3       | 2      | 2     |
| ECs5343   | 2      | 2      | 2       | 2      | 2     |
| ECs5346   | 2      | 2      | 2       | 2      | 2     |
| ECs5347   | 3      | 3      | 3       | 2      | 2     |
| ECs5348   | 3      | 3      | 3       | 2      | 2     |
| ECs5349   | 3      | 3      | 3       | 2      | 2     |
| ECs5350   | 2      | 2      | 2       | 2      | 2     |
| ECs5351   | 2      | 2      | 2       | 2      | 2     |
| ECs5352   | 2      | 2      | 2       | 2      | 2     |
| ECs5353   | 2      | 2      | 2       | 2      | 2     |
| ECs5354   | 2      | 2      | 2       | 2      | 2     |
| ECs5355   | 2      | 2      | 2       | 2      | 2     |
| ECs5356   | 3      | 3      | 3       | 2      | 2     |
| ECs5357   | 2      | 2      | 2       | 2      | 2     |
| ECs5358   | 2      | 2      | 2       | 2      | 2     |
| ECs5359   | 2      | 2      | 2       | 2      | 2     |
| ECs5361   | 3      | 65     | 3       | 2      | 2     |
